# Supplementary material for: Homo- and copolymerization of norbornene using tridentate IzQO palladium catalysts with dimethylaminoethyl as a side arm
Source: Royal Society of Chemistry journal article supplement (doi:10.1039/d1py00699a), 2021-01-01
Supplement: d1py00699a1.pdf [file d1py00699a1.pdf]

Supporting Information for:

## **Homo- and copolymerization of norbornene using tridentate**

### **IzQO palladium catalysts with dimethylaminoethyl as a side arm**

Jie Dong<sup>a</sup> and Baiquan Wang<sup>\*a,b</sup>

<sup>a</sup>State Key Laboratory of Elemento-Organic Chemistry, College of Chemistry, Nankai University, Tianjin 300071, PR China and <sup>b</sup>State Key Laboratory of Organometallic Chemistry, Shanghai Institute of Organic Chemistry, Chinese Academy of Sciences, Shanghai 200032, PR China

|                                                                                          |    |
|------------------------------------------------------------------------------------------|----|
| 1. Additional Polymerization results.....                                                | 2  |
| 2. NMR spectra of the compounds <b>1–2</b> and complexes <b>3</b> and <b>4a–4d</b> ..... | 3  |
| 3. NMR spectra of polymers.....                                                          | 11 |
| 4. GPC curves of polymers.....                                                           | 21 |
| 5. TGA curves of polymers.....                                                           | 28 |
| 6. DSC curves of polymers.....                                                           | 30 |
| 7. X-ray crystallography of complexes <b>3</b> , <b>4a</b> , and <b>4b</b> .....         | 35 |

## 1. Additional polymerization results

Table S1 Norbornene polymerization catalyzed by **3** and **4a–4d** activated by Et<sub>2</sub>AlCl<sup>a</sup>

| entry | cat.( $\mu$ mol) | T (°C) | Al/Pd | t (min) | Conv. (%) | activity <sup>b</sup> |
|-------|------------------|--------|-------|---------|-----------|-----------------------|
| 1     | <b>4a (1)</b>    | 20     | 500   | 2       | 31.0      | 9.3                   |
| 2     | <b>4a (1)</b>    | 40     | 500   | 2       | 99.9      | 30.0                  |
| 3     | <b>4a (1)</b>    | 60     | 500   | 2       | 47.3      | 14.2                  |
| 4     | <b>4a (1)</b>    | 80     | 500   | 2       | 27.7      | 8.3                   |
| 5     | <b>4a (1)</b>    | 40     | 200   | 2       | 92.3      | 27.7                  |
| 6     | <b>4a (1)</b>    | 40     | 200   | 1       | 97.7      | 58.6                  |
| 7     | <b>4a (1)</b>    | 40     | 100   | 1       | 98.8      | 59.3                  |
| 8     | <b>4a (0.5)</b>  | 40     | 100   | 1       | 66.3      | 79.6                  |
| 9     | <b>4b (0.5)</b>  | 40     | 100   | 1       | 60.3      | 72.4                  |
| 10    | <b>4c (0.5)</b>  | 40     | 100   | 1       | 99.9      | 119.9                 |
| 11    | <b>4c (0.3)</b>  | 40     | 100   | 1       | 97.2      | 194.4                 |
| 12    | <b>4d (0.5)</b>  | 40     | 100   | 1       | 55.9      | 67.1                  |
| 13    | <b>3 (0.5)</b>   | 40     | 100   | 1       | 38.6      | 46.3                  |

<sup>a</sup>Polymerization conditions: solvent, 1,2-dichlorobenzene;  $V_{\text{total}}$ , 10 mL; norbornene, 1.0 g; Et<sub>2</sub>AlCl, 2.0 M in hexane. <sup>b</sup>In units of 10<sup>6</sup> g of PNB (mol of Pd)<sup>-1</sup> h<sup>-1</sup>.

Table S2 NB-UA copolymerization catalyzed by **3** and **4a–4d** activated by Et<sub>2</sub>AlCl or MAO<sup>a</sup>

| entry          | cat.      | Cocat.               | n (total monomer) | comonomer (mol%) | Yield (mg) |
|----------------|-----------|----------------------|-------------------|------------------|------------|
| 1              | <b>4c</b> | Et <sub>2</sub> AlCl | 10                | 5                | 28         |
| 2              | <b>4c</b> | Et <sub>2</sub> AlCl | 10                | 5                | 10         |
| 3 <sup>b</sup> | <b>4c</b> | MAO                  | 10                | 5                | 5.6        |
| 4              | <b>4a</b> | Et <sub>2</sub> AlCl | 10                | 5                | 2          |
| 5              | <b>4b</b> | Et <sub>2</sub> AlCl | 10                | 5                | trace      |
| 6              | <b>4d</b> | Et <sub>2</sub> AlCl | 10                | 5                | 5.3        |
| 7              | <b>3</b>  | Et <sub>2</sub> AlCl | 10                | 5                | trace      |

<sup>a</sup>Polymerization conditions: [Pd], 5  $\mu$ mol; solvent, 1,2-dichlorobenzene;  $V_{\text{total}}$ , 15 mL;  $n_{\text{total monomer}}$ , 10 mmol; Et<sub>2</sub>AlCl, 2.0 M in hexane, Al/Pd = 200; 40 °C, 1 h. <sup>b</sup>MAO instead of Et<sub>2</sub>AlCl, MAO, 1.5 M in toluene; Al/Pd = 1000.

## 2. NMR spectra of the compounds 1–2 and complexes 3 and 4a–4d.

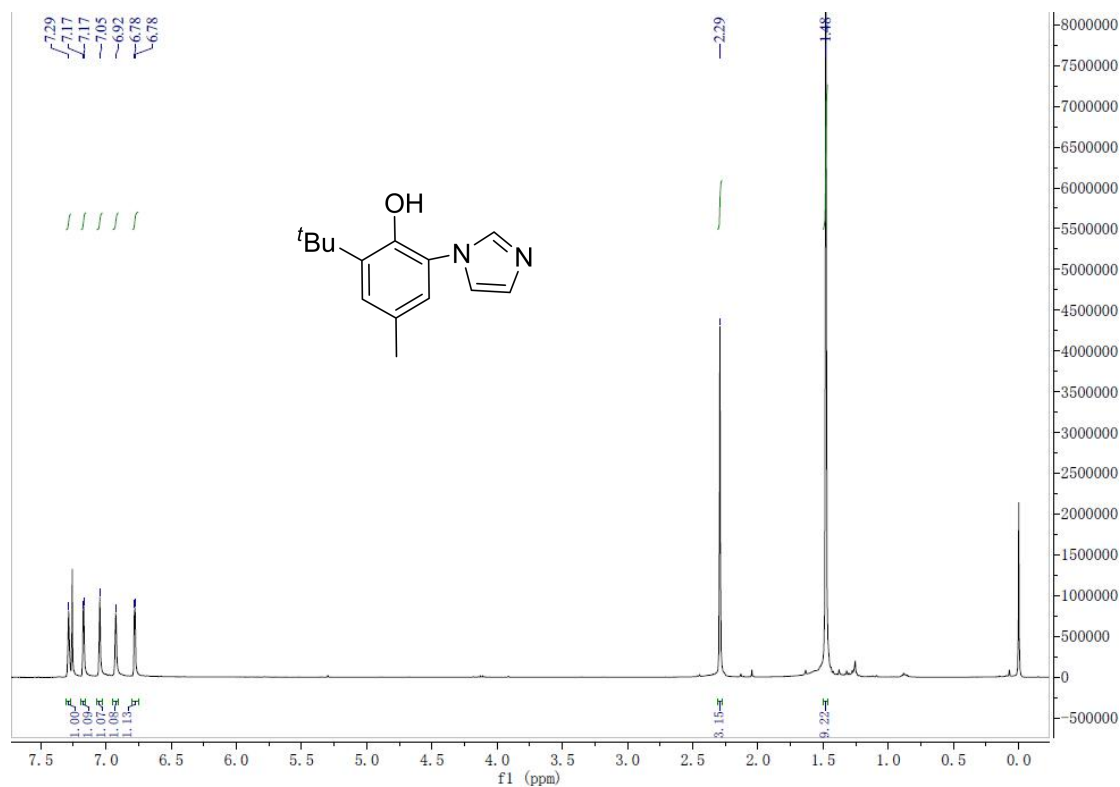

Figure S1. <sup>1</sup>H NMR (400 MHz, CDCl<sub>3</sub>) spectra of compound 1.

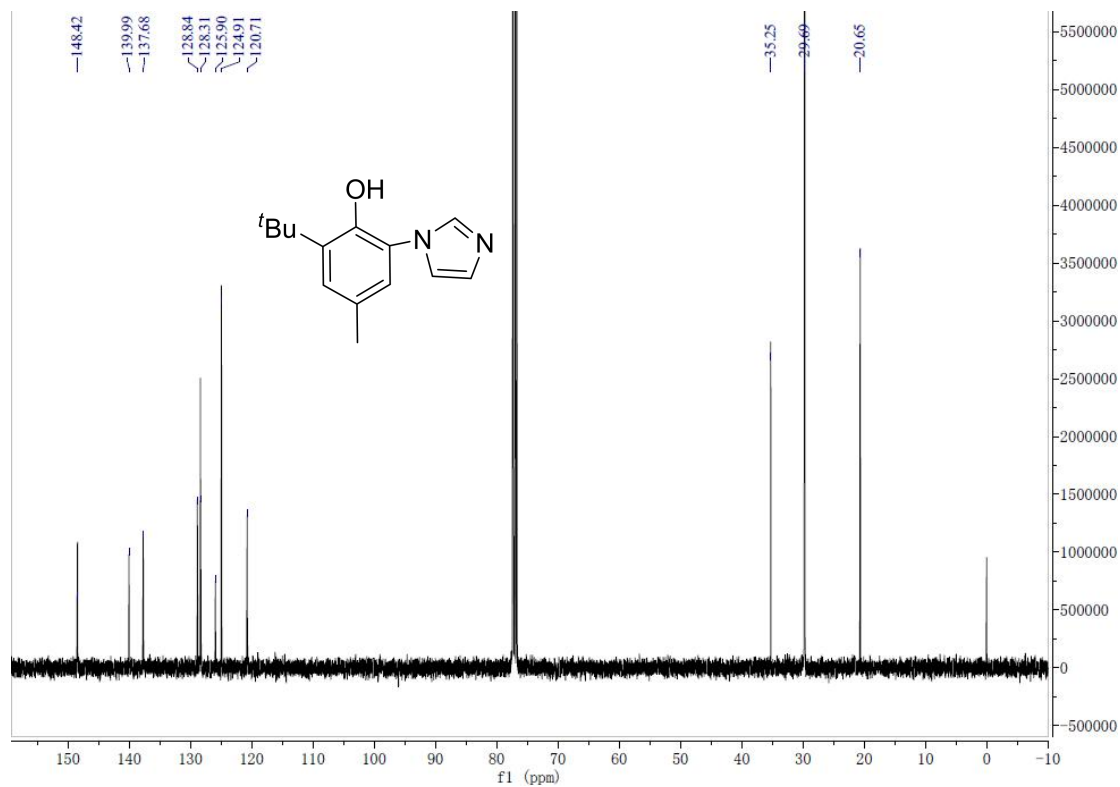

Figure S2. <sup>13</sup>C NMR (101 MHz, CDCl<sub>3</sub>) spectra of compound 1.

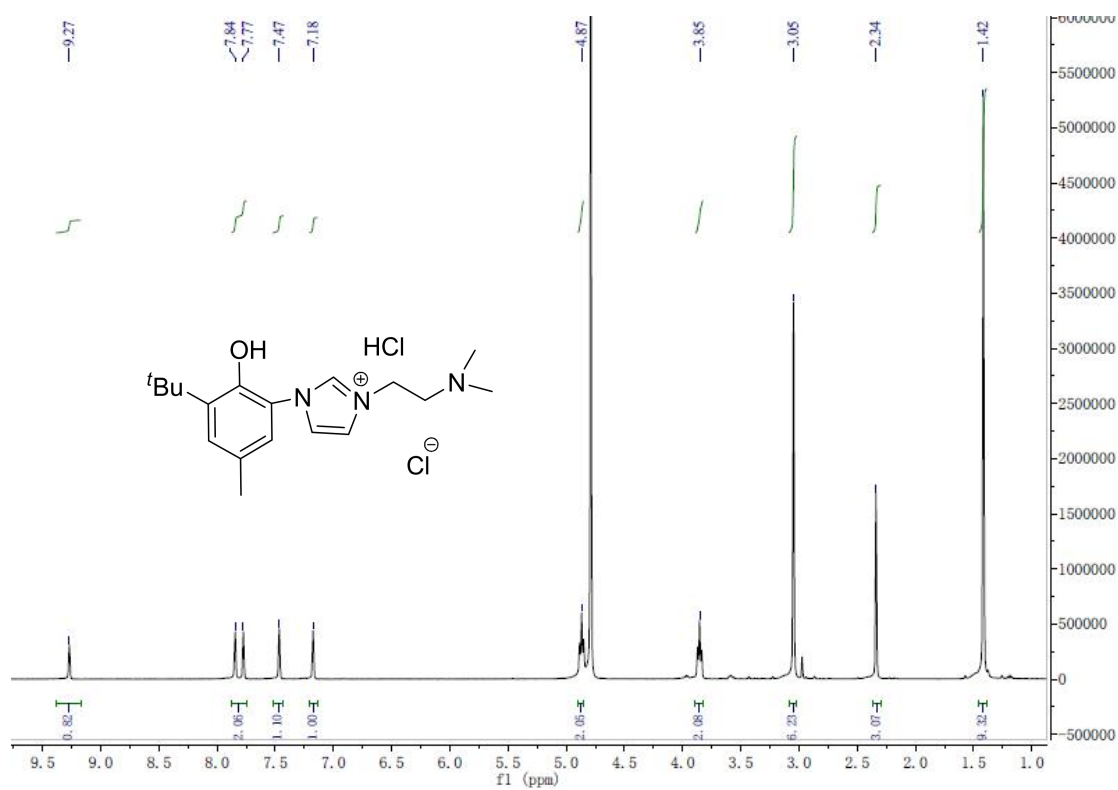

Figure S3.  $^1\text{H}$  NMR (400 MHz,  $\text{D}_2\text{O}$ ) spectra of compound 2.

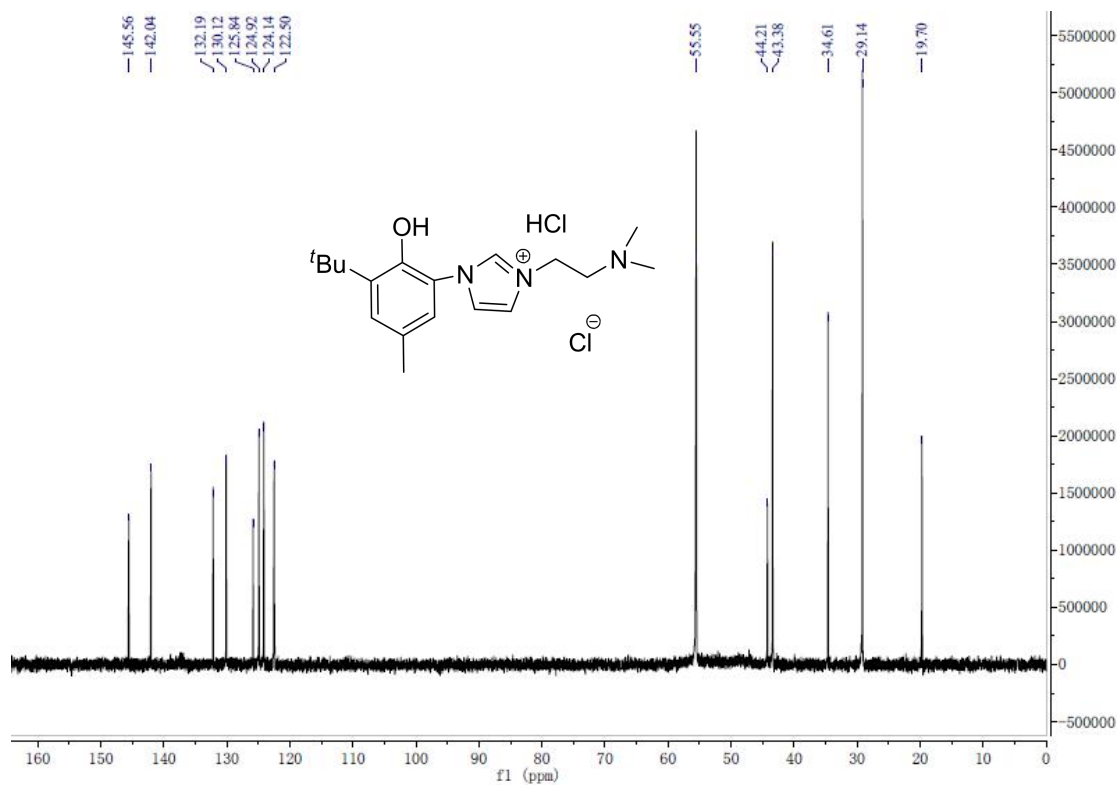

Figure S4.  $^{13}\text{C}$  NMR (101 MHz,  $\text{D}_2\text{O}$ ) spectra of compound 2.

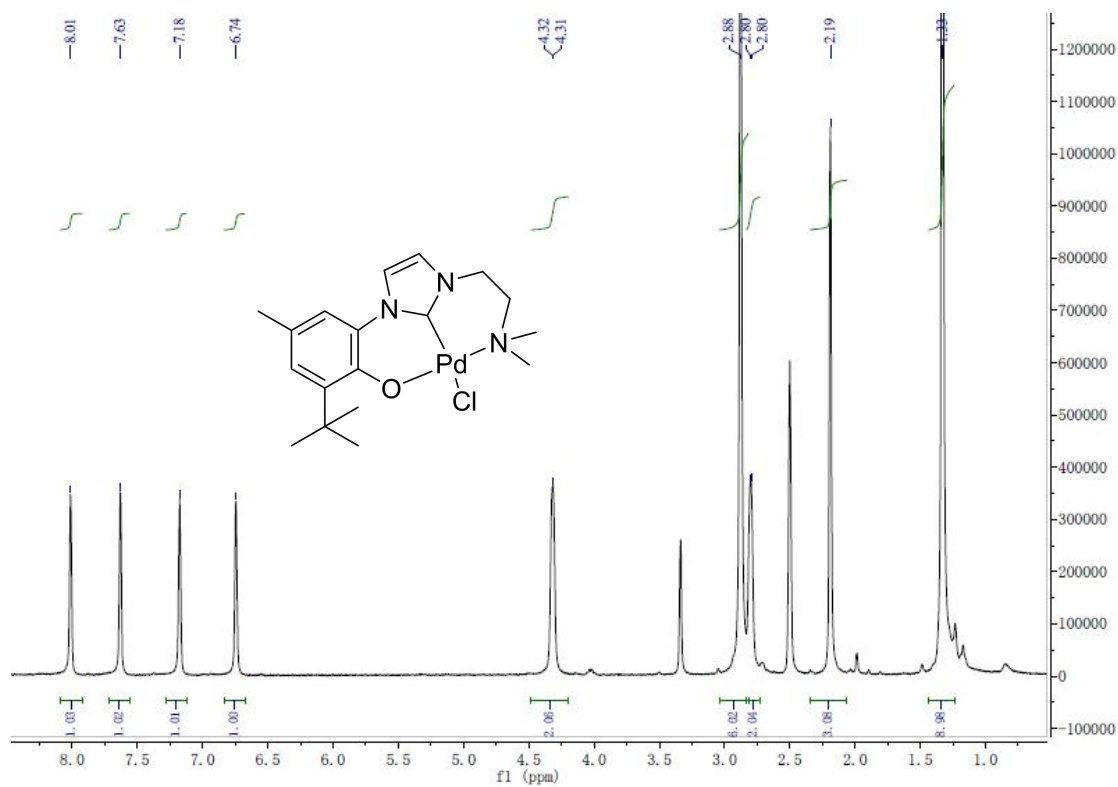

**Figure S5.  $^1\text{H}$  NMR (400 MHz, DMSO) spectra of complex 3.**

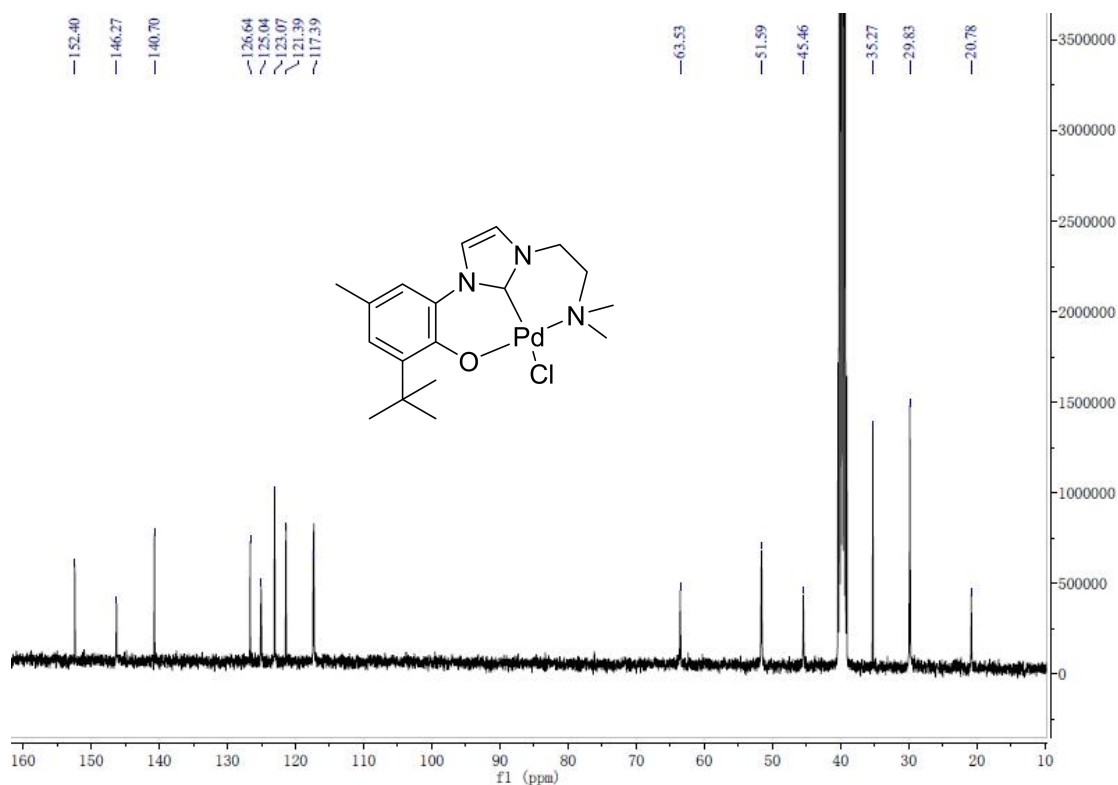

**Figure S6.  $^{13}\text{C}$  NMR (101 MHz, DMSO) spectra of complex 3.**

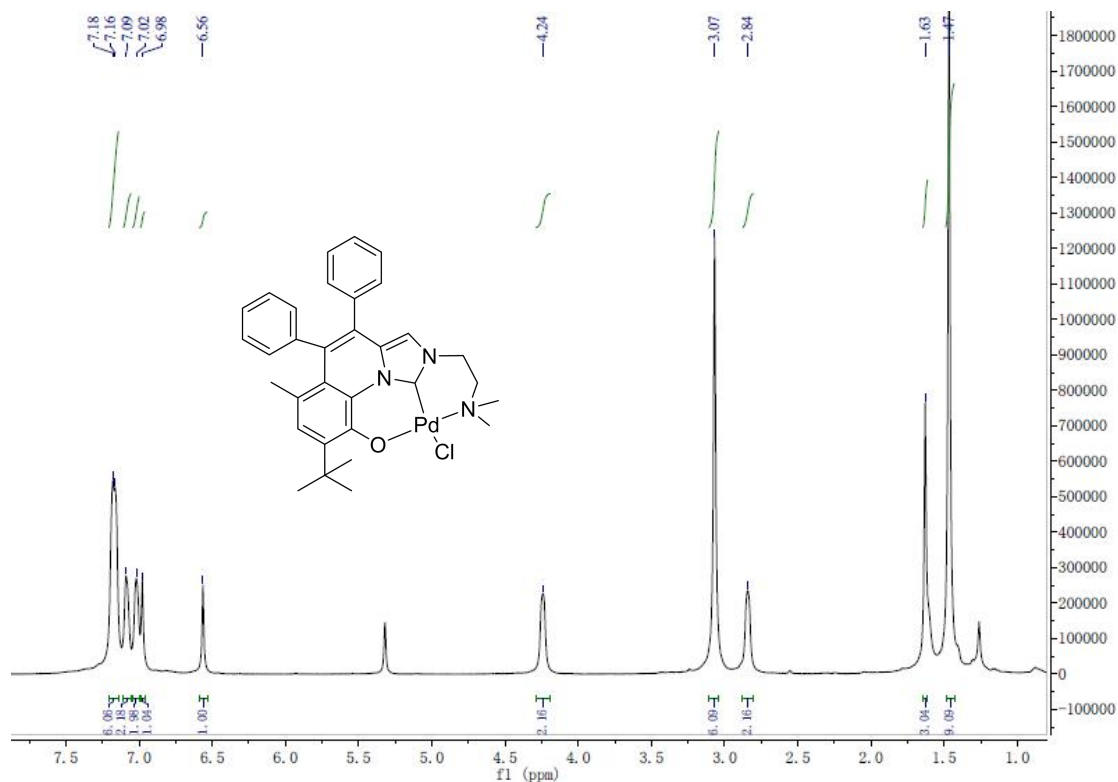

Figure S7. <sup>1</sup>H NMR (400 MHz, CD<sub>2</sub>Cl<sub>2</sub>) spectra of complex 4a.

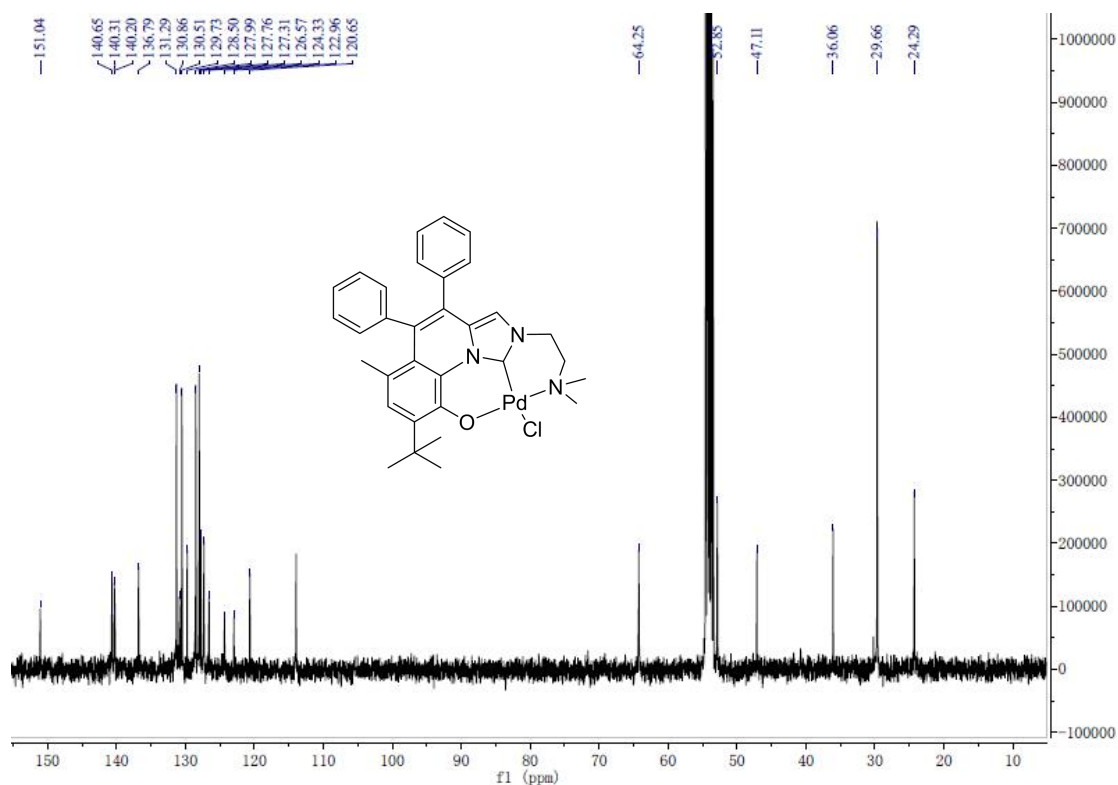

Figure S8. <sup>13</sup>C NMR (101 MHz, CD<sub>2</sub>Cl<sub>2</sub>) spectra of complex 4a.

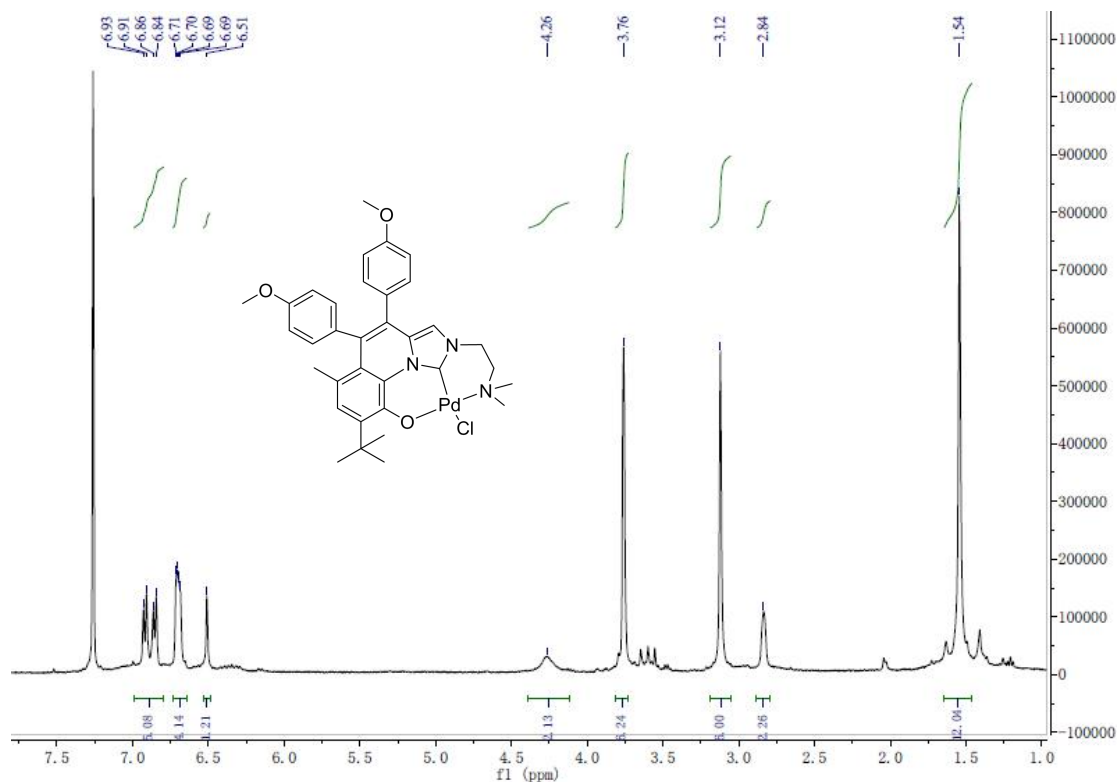

Figure S9.  $^1\text{H}$  NMR (400 MHz,  $\text{CDCl}_3$ ) spectra of complex **4b**.

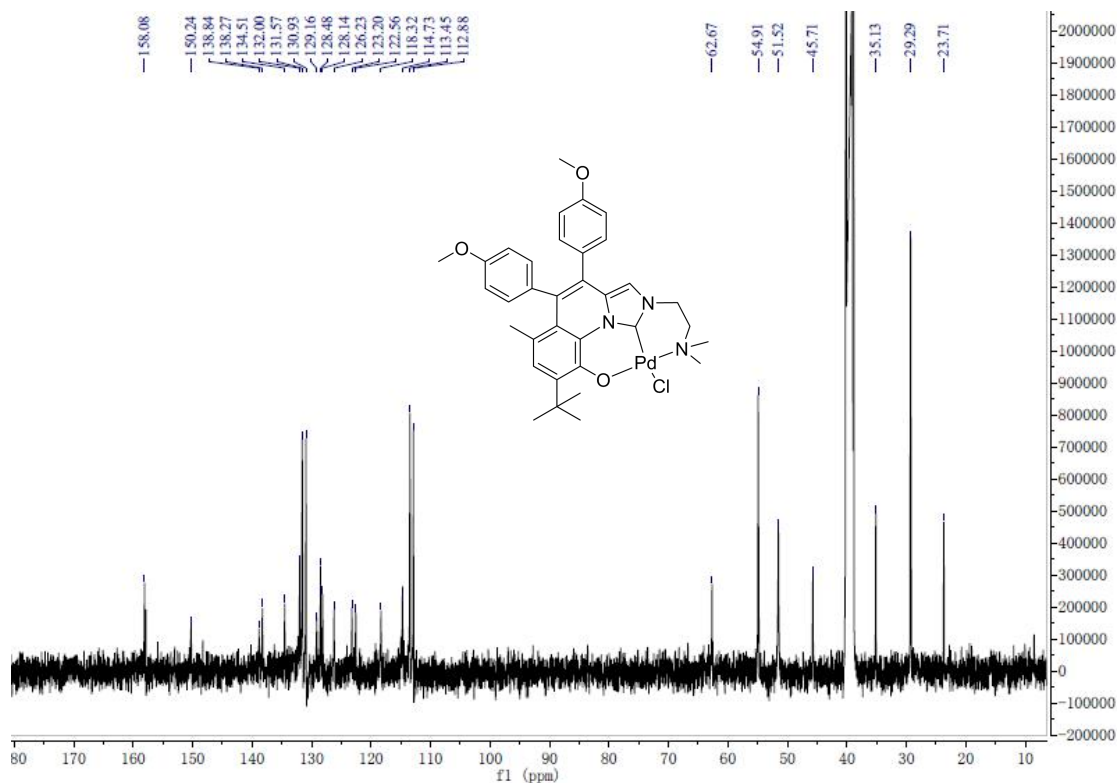

Figure S10.  $^{13}\text{C}$  NMR (101 MHz,  $\text{DMSO}$ ) spectra of complex **4b**.

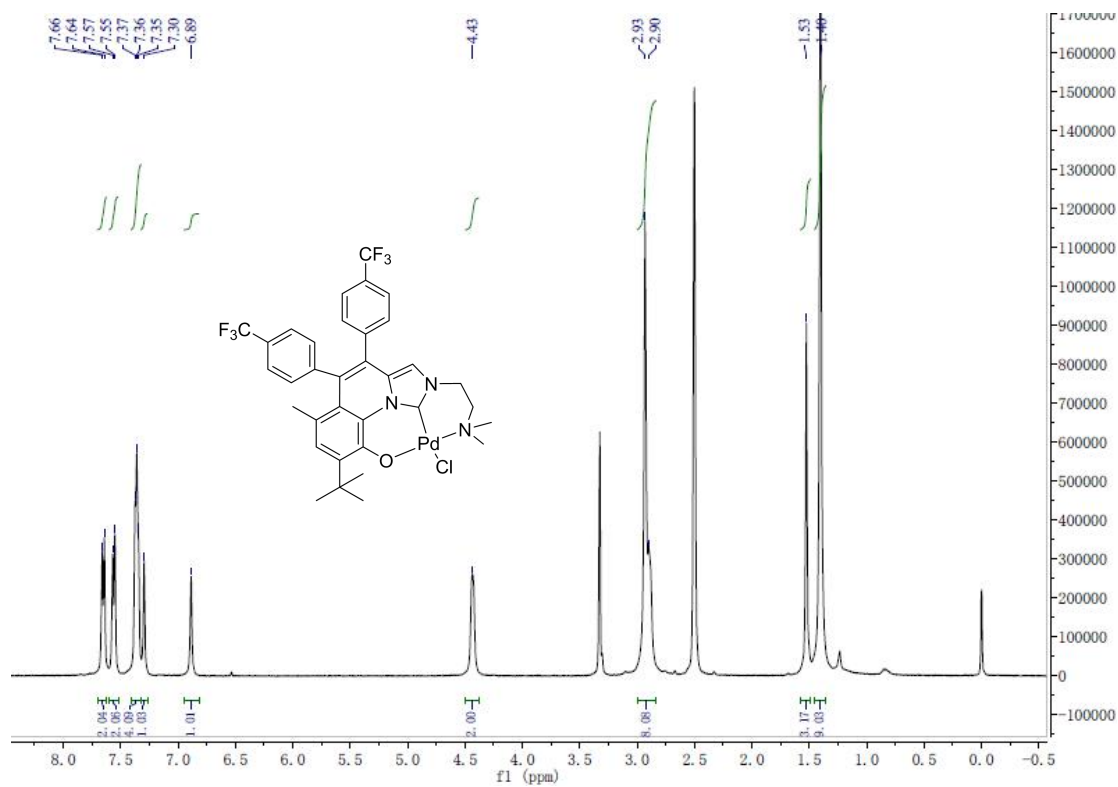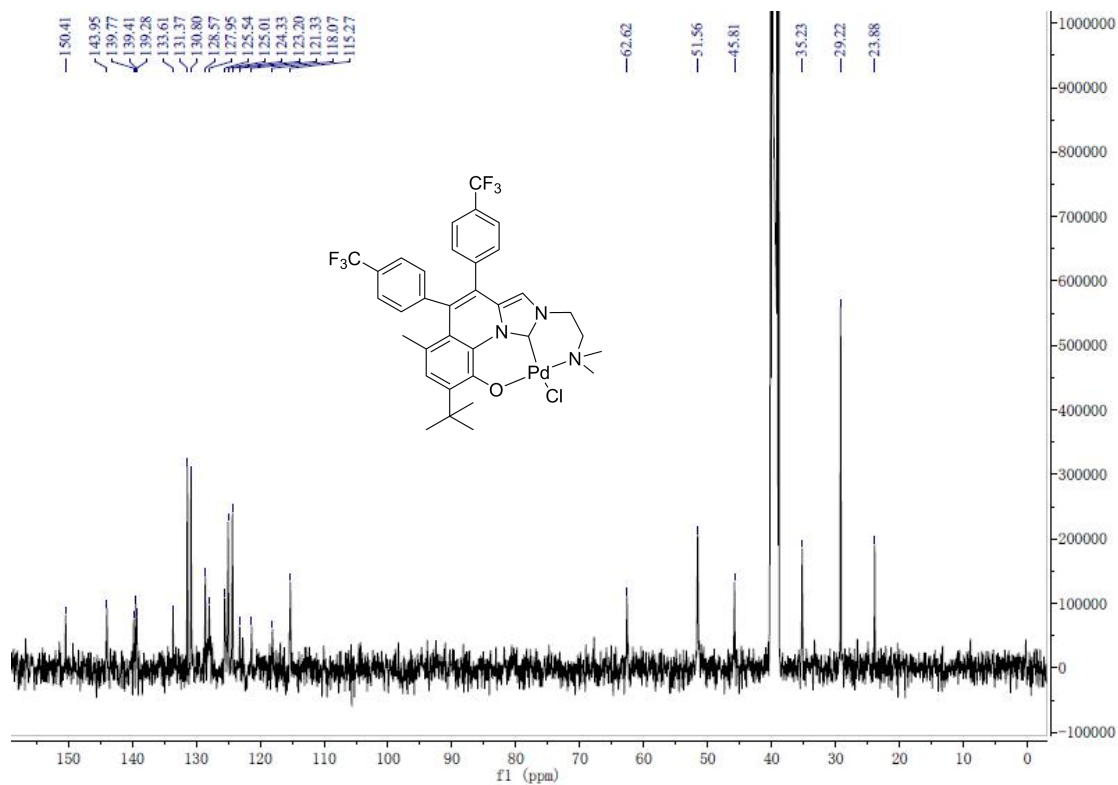



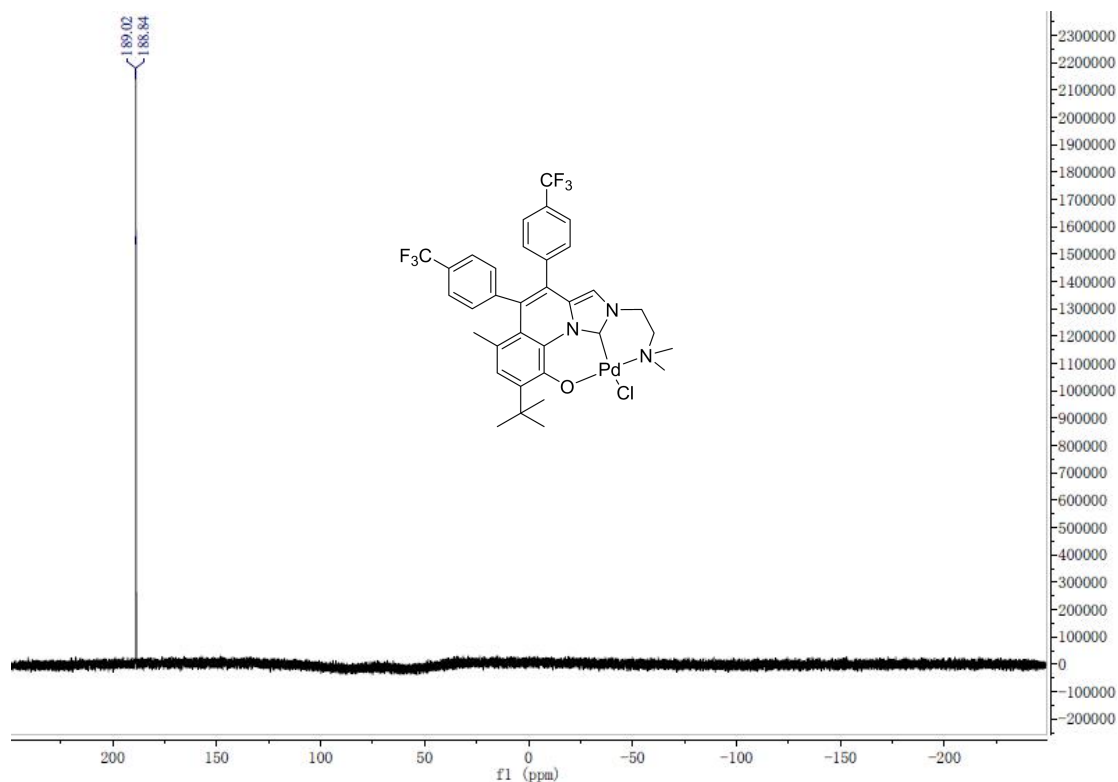

**Figure S13.**  $^{19}\text{F}$  NMR (376 MHz, DMSO) spectra of complex **4c**.

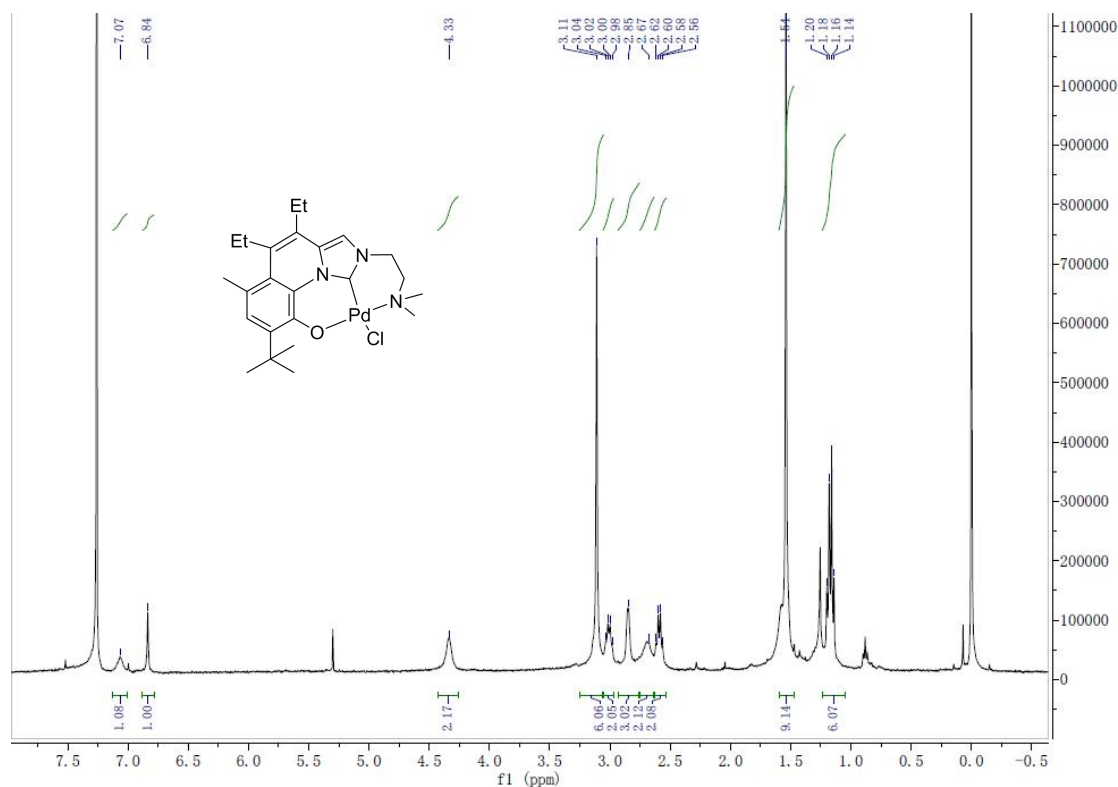

**Figure S14.**  $^1\text{H}$  NMR (400 MHz,  $\text{CDCl}_3$ ) spectra of complex **4d**.

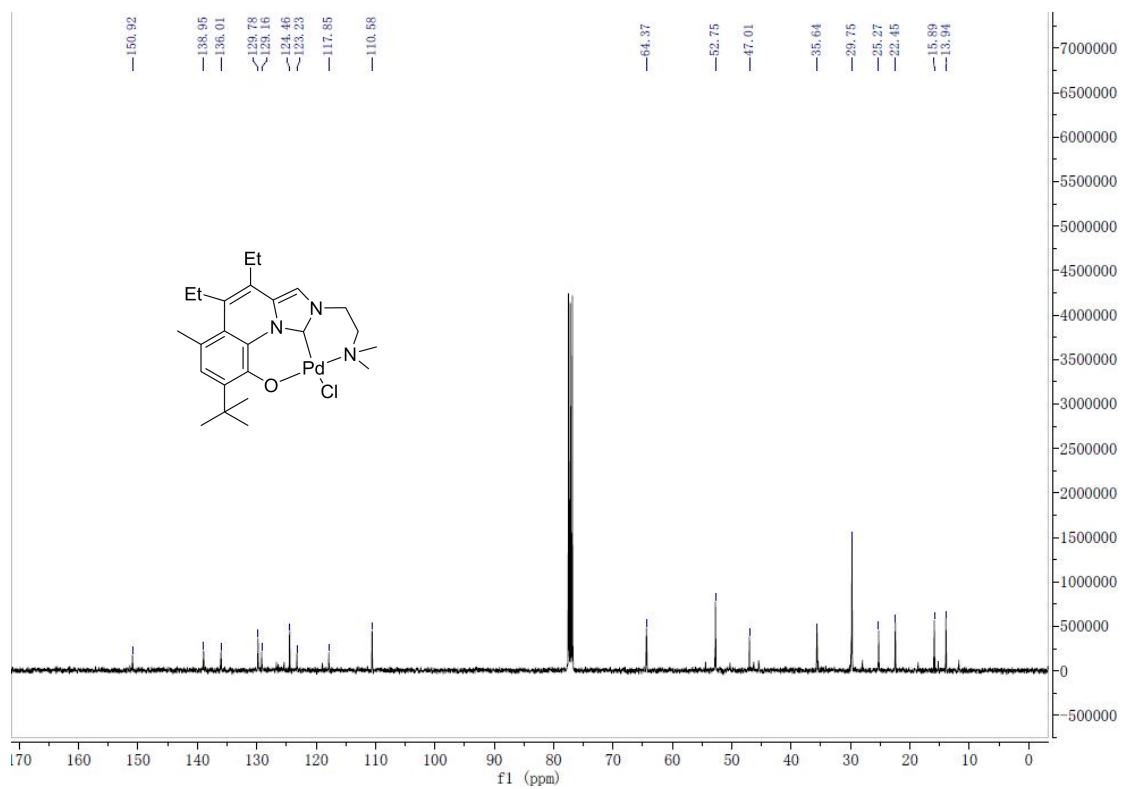

**Figure S15.**  $^{13}\text{C}$  NMR (101 MHz,  $\text{CDCl}_3$ ) spectra of complex **4d**.

### 3. NMR spectra of polymers.

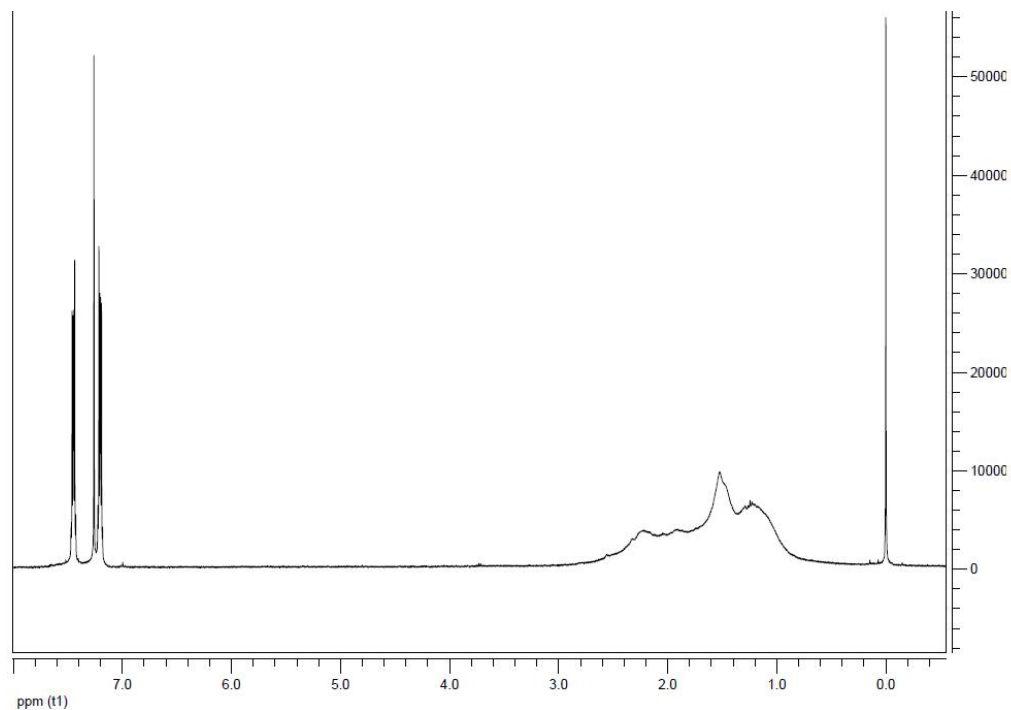

**Figure S16.** <sup>1</sup>H NMR (400 MHz, CDCl<sub>3</sub>) spectra of norbornene homopolymers (Table 1 entry 8.).

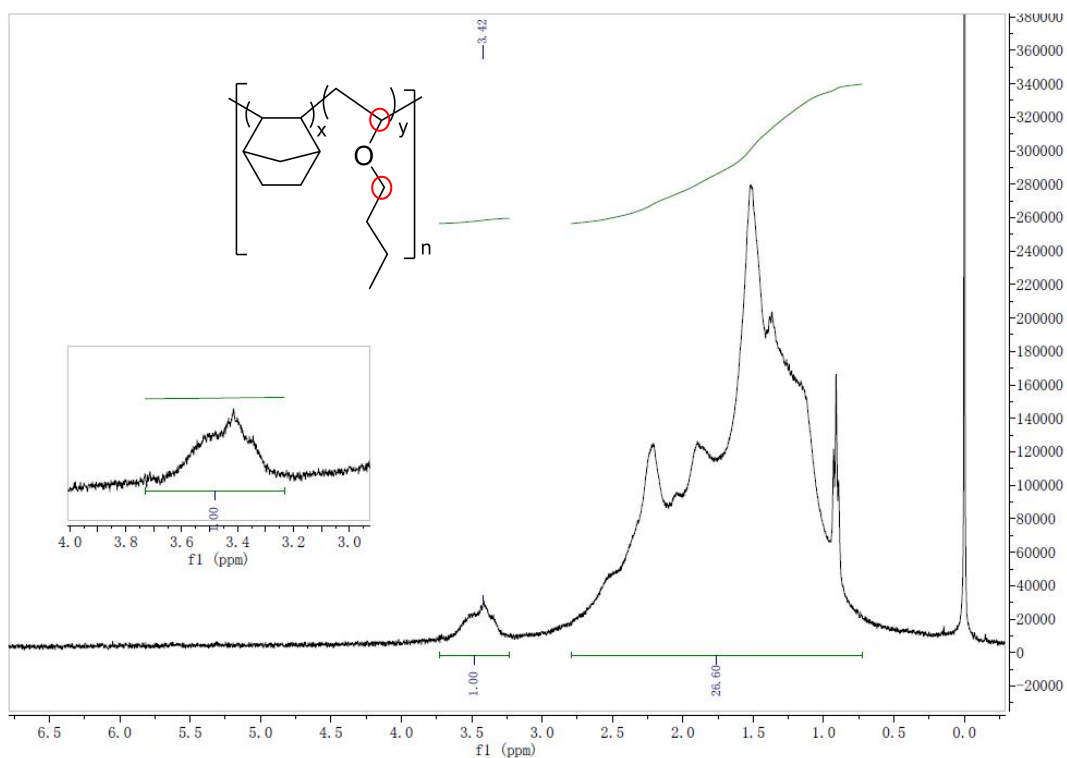

**Figure S17.** <sup>1</sup>H NMR (400 MHz, CDCl<sub>3</sub>) spectra of NB-BVE copolymer obtained by **4c** (entry 2, Table 2).

The incorporation (mol%) of BVE in copolymer:

$$x = \frac{\frac{I_a}{3}}{\frac{I_a}{3} + \frac{I_b - \frac{I_a}{3} \times 9}{10}} \times 100\% = \frac{10I_a}{3I_b + I_a}$$

$I_a$  – The integration of methylene (–CH<sub>2</sub>–O–) and methyne (–CH–O–) in BVE units;

$I_b$  – The integration of the peaks from 0.75–2.75 ppm.

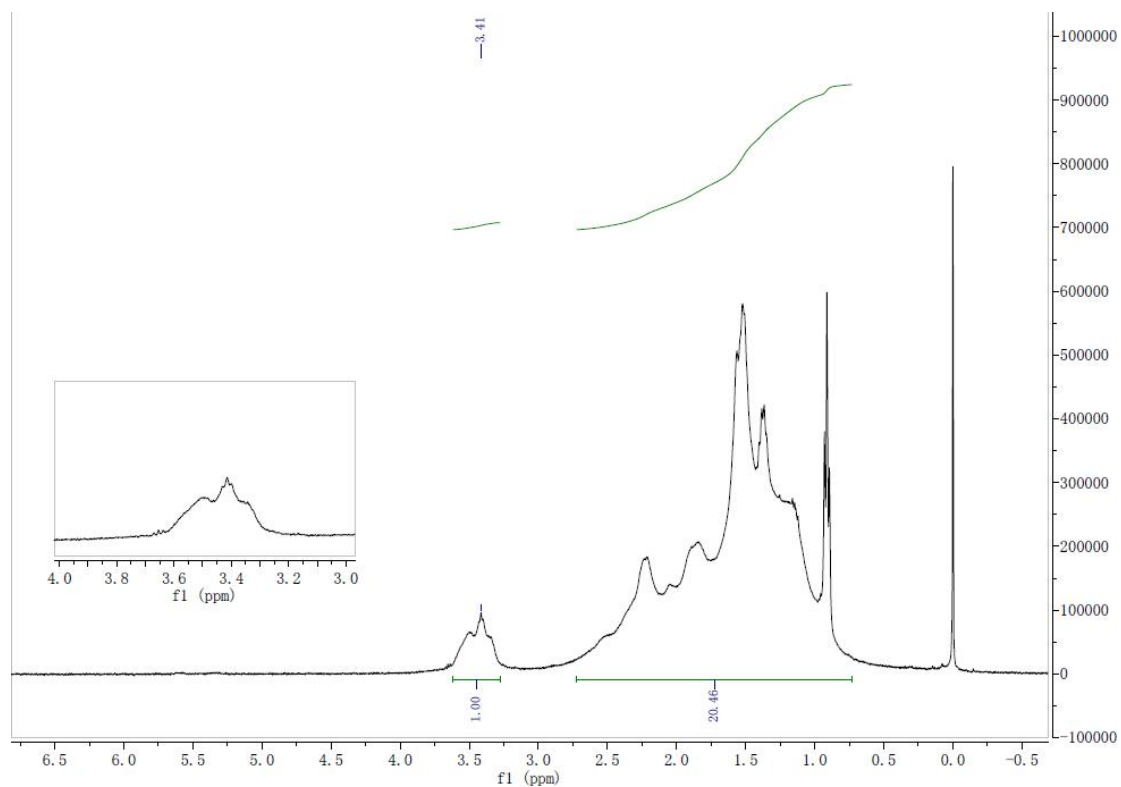

**Figure S18.**  $^1\text{H}$  NMR (400 MHz,  $\text{CDCl}_3$ ) spectra of NB-BVE copolymer obtained by **4c** (entry 3, Table 2).

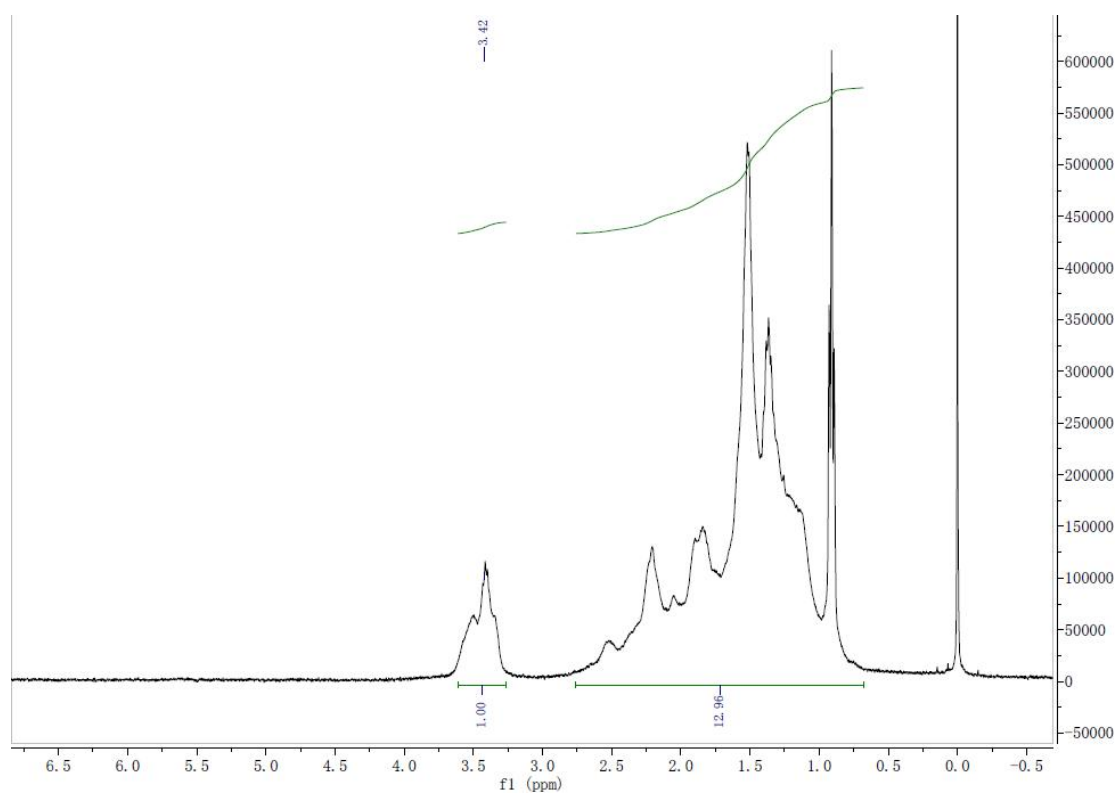

**Figure S19.**  $^1\text{H}$  NMR (400 MHz,  $\text{CDCl}_3$ ) spectra of NB-BVE copolymer obtained by **4c** (entry 4, Table 2).

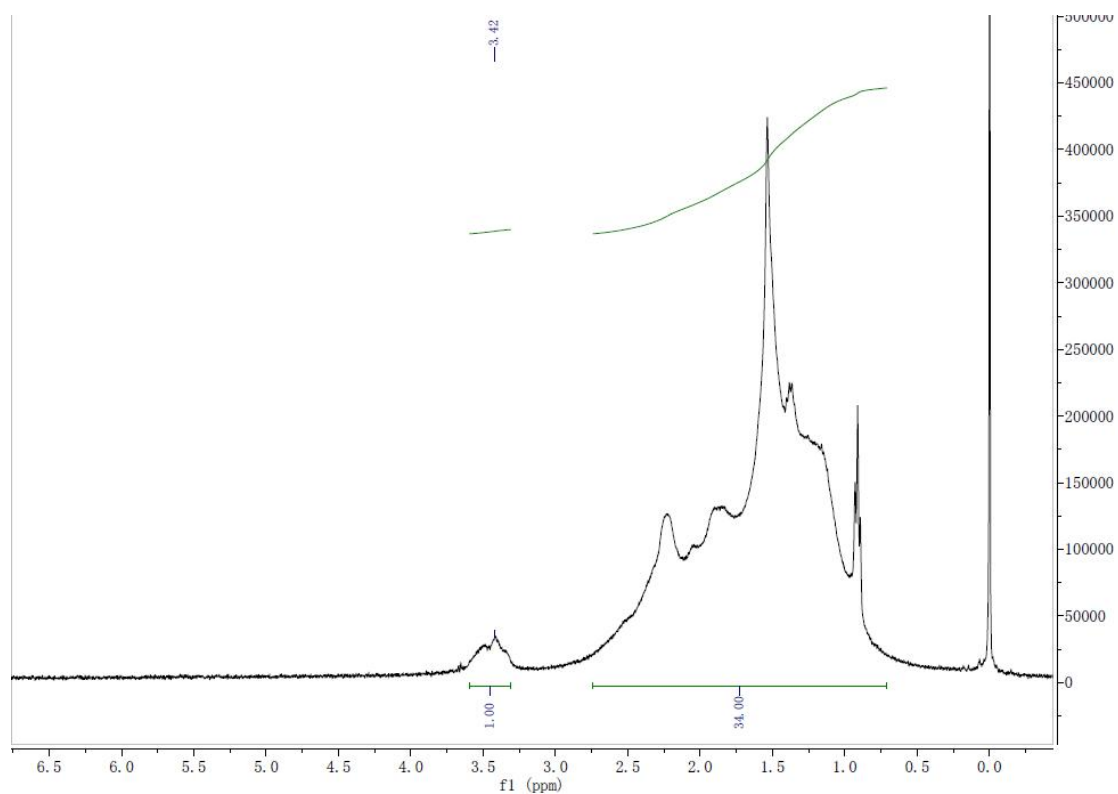

**Figure S20.** <sup>1</sup>H NMR (400 MHz, CDCl<sub>3</sub>) spectra of NB-BVE copolymer obtained by **4a** (entry 6, Table 2).

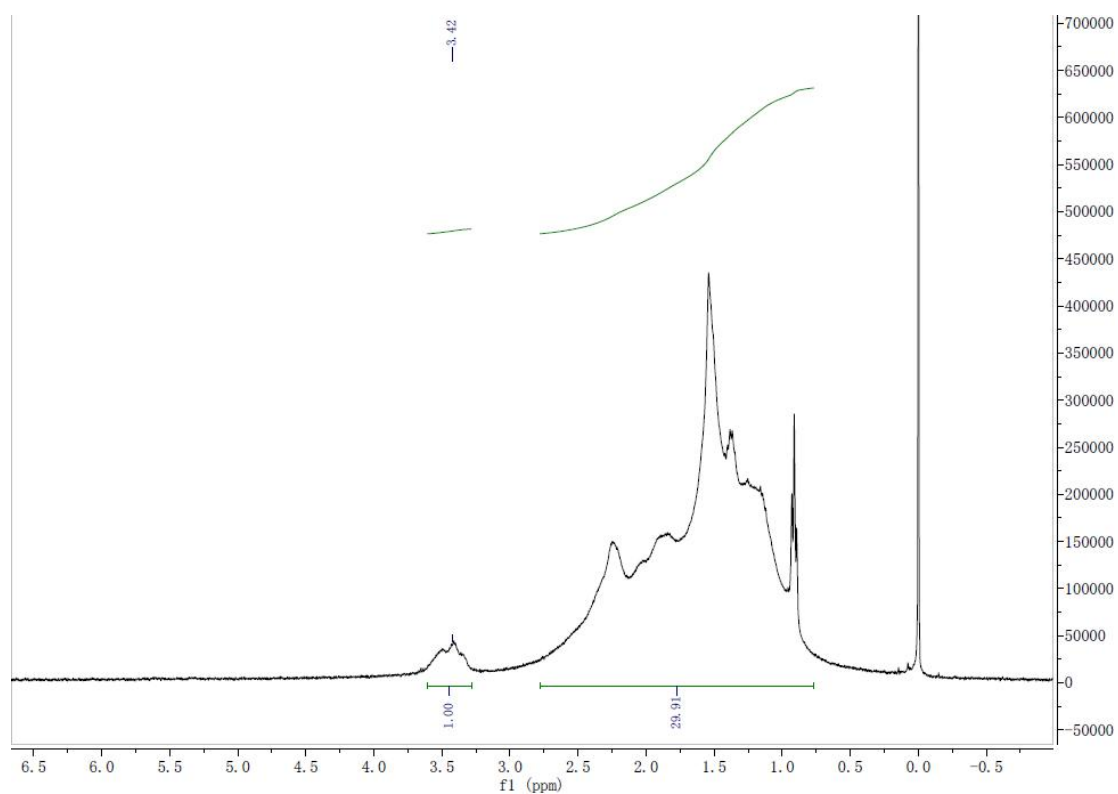

**Figure S21.** <sup>1</sup>H NMR (400 MHz, CDCl<sub>3</sub>) spectra of NB-BVE copolymer obtained by **4b** (entry 7, Table 2).

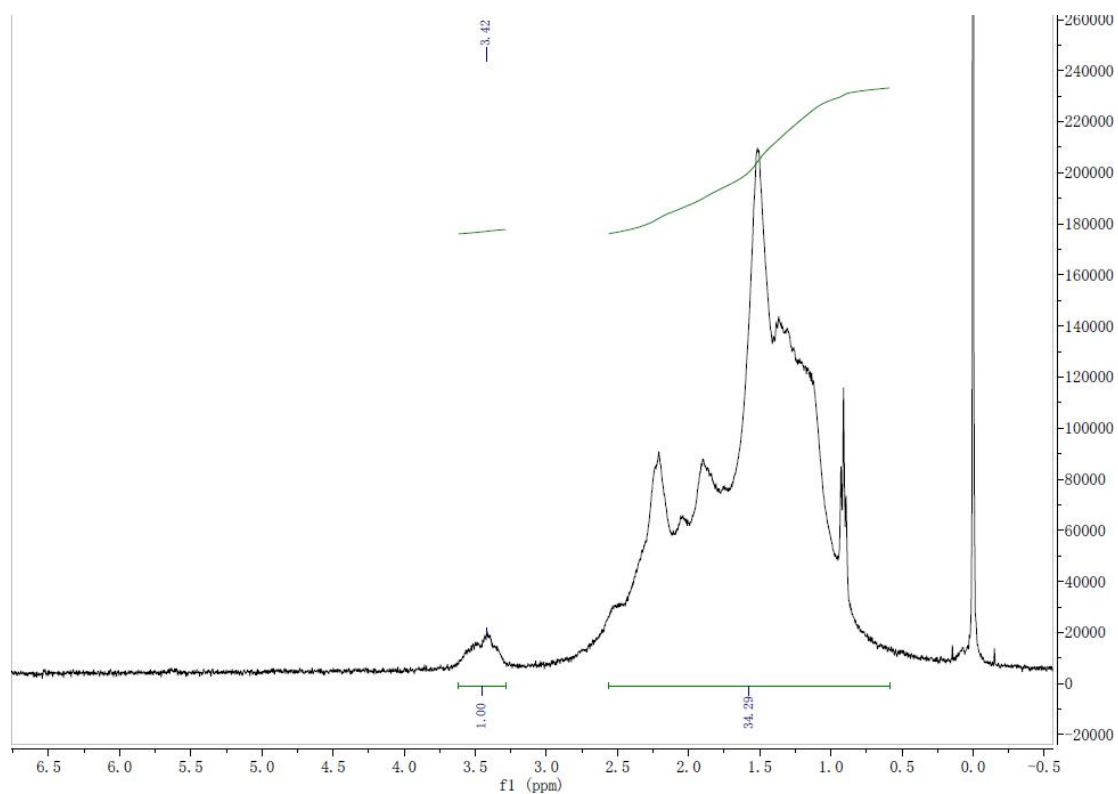

**Figure S22.**  $^1\text{H}$  NMR (400 MHz,  $\text{CDCl}_3$ ) spectra of NB-BVE copolymer obtained by **4d** (entry 8, Table 2).

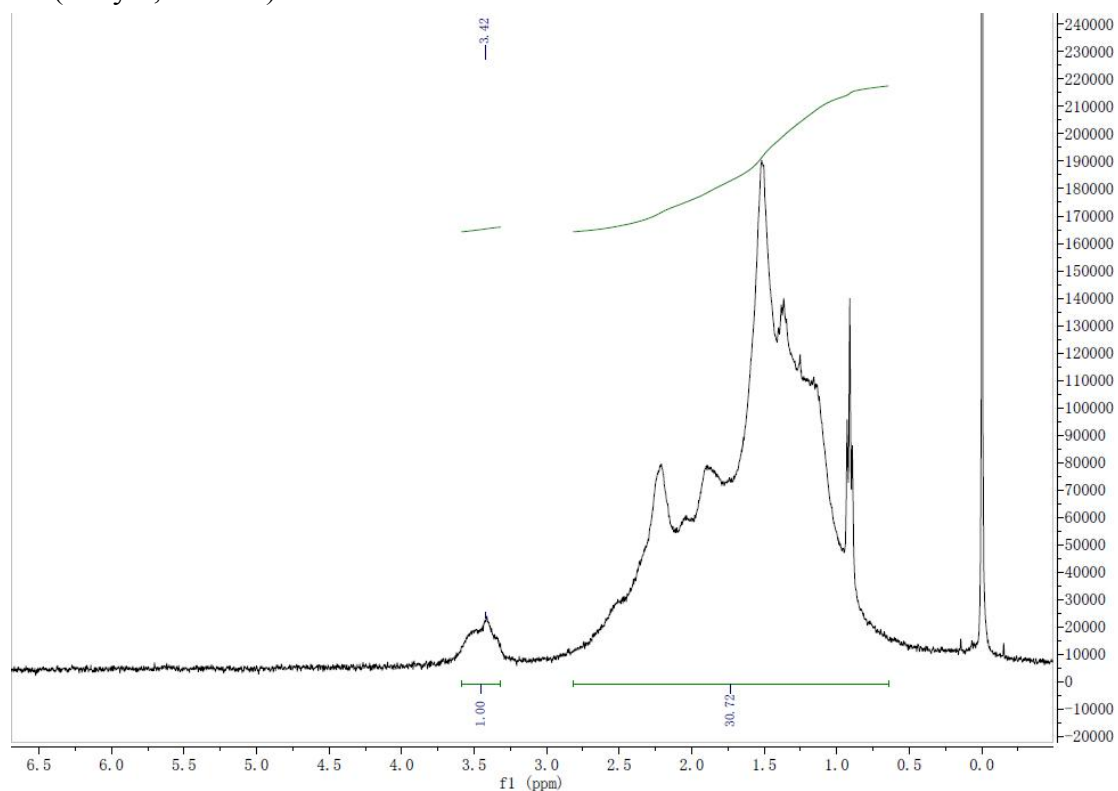

**Figure S23.**  $^1\text{H}$  NMR (400 MHz,  $\text{CDCl}_3$ ) spectra of NB-BVE copolymer obtained by **3** (entry 9, Table 2).

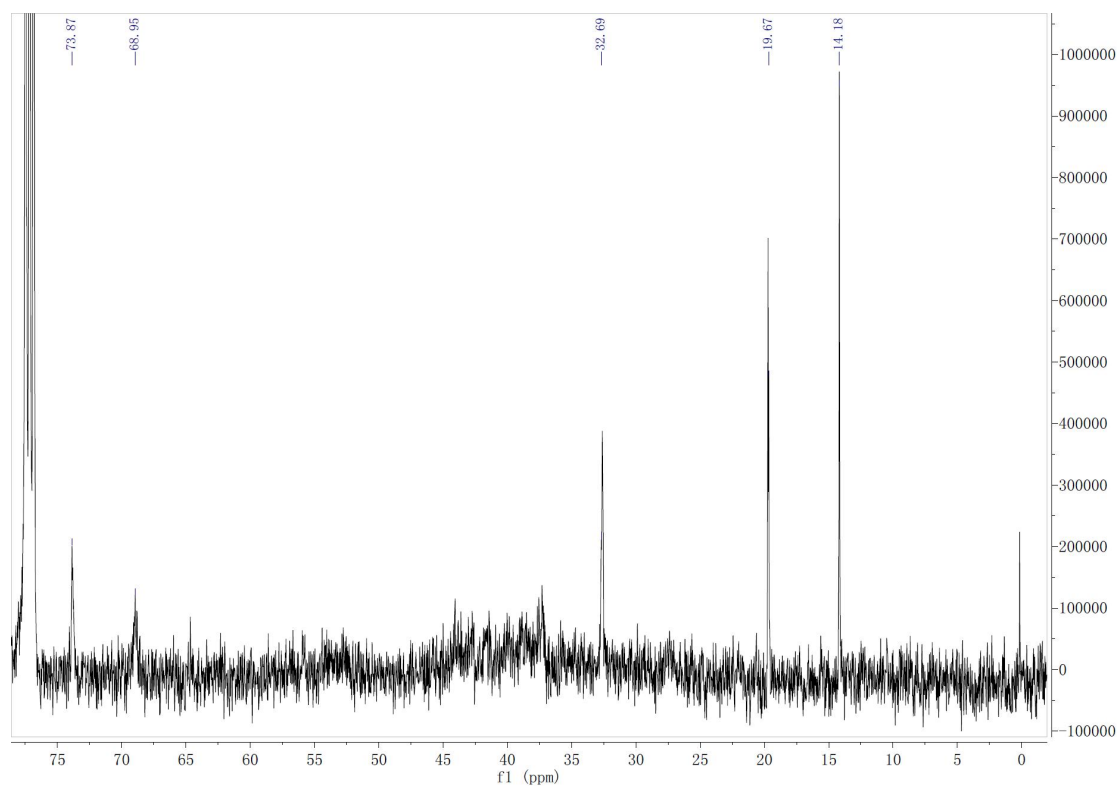

**Figure S24.**  $^{13}\text{C}$  NMR (101 MHz,  $\text{CDCl}_3$ ) spectra of NB-BVE copolymer obtained by **4c** (entry 4, Table 2).



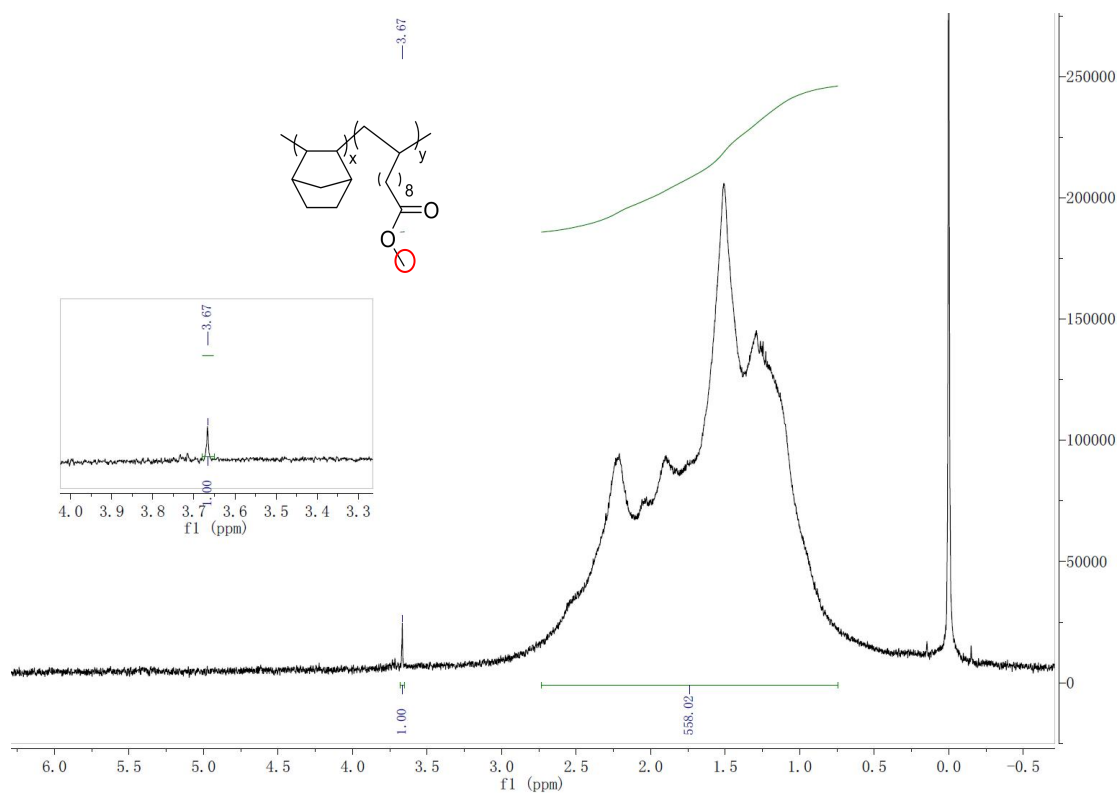

**Figure S25.** <sup>1</sup>H NMR (400 MHz, CDCl<sub>3</sub>) spectra of NB-UA copolymer obtained by **4c** (entry 11, Table 2).

The incorporation (mol%) of UA in copolymer:

$$x = \frac{\frac{I_a}{3}}{\frac{I_a}{3} + \frac{I_b - \frac{I_a}{3} \times 19}{10}} \times 100\% = \frac{10I_a}{3I_b - 9I_a}$$

*I<sub>a</sub>* – The integration of methyl (CH<sub>3</sub>-O-) in UA units;

*I<sub>b</sub>* – The integration of the peaks from 0.75–2.75 ppm.

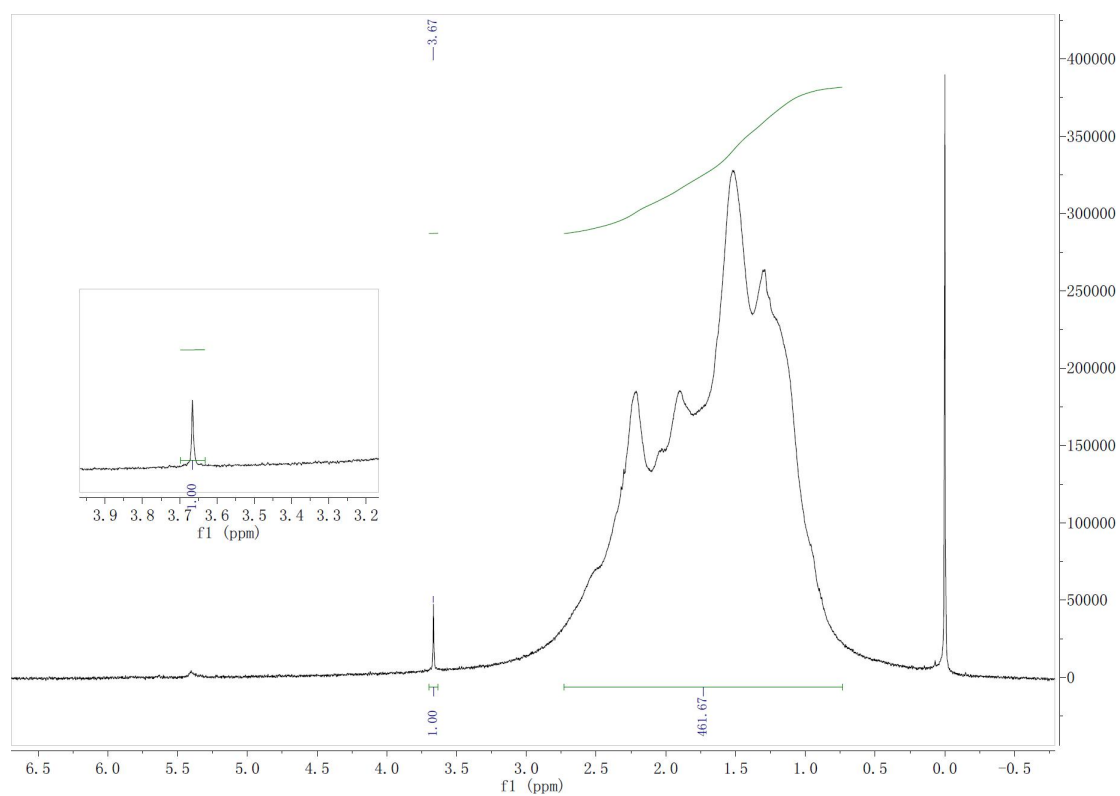

**Figure S26.**  $^1\text{H}$  NMR (400 MHz,  $\text{CDCl}_3$ ) spectra of NB-UA copolymer obtained by **4c** (entry 12, Table 2).

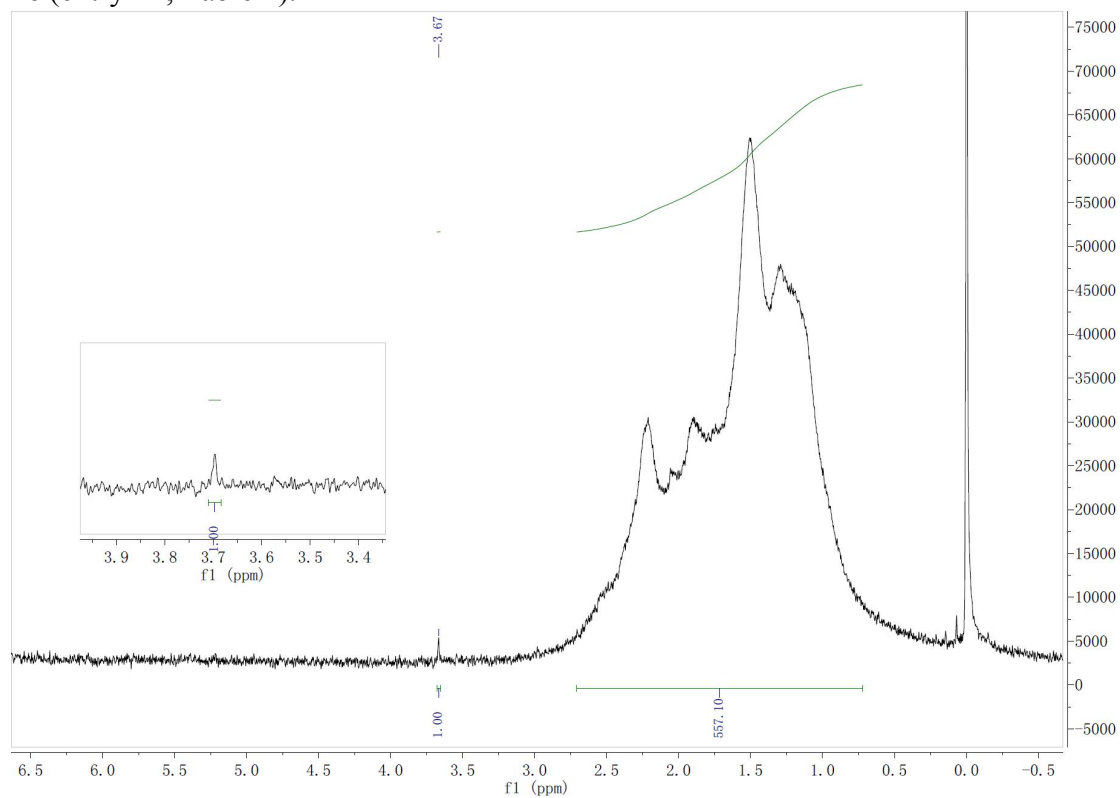

**Figure S27.**  $^1\text{H}$  NMR (400 MHz,  $\text{CDCl}_3$ ) spectra of NB-UA copolymer obtained by **4a** (entry 14, Table 2).

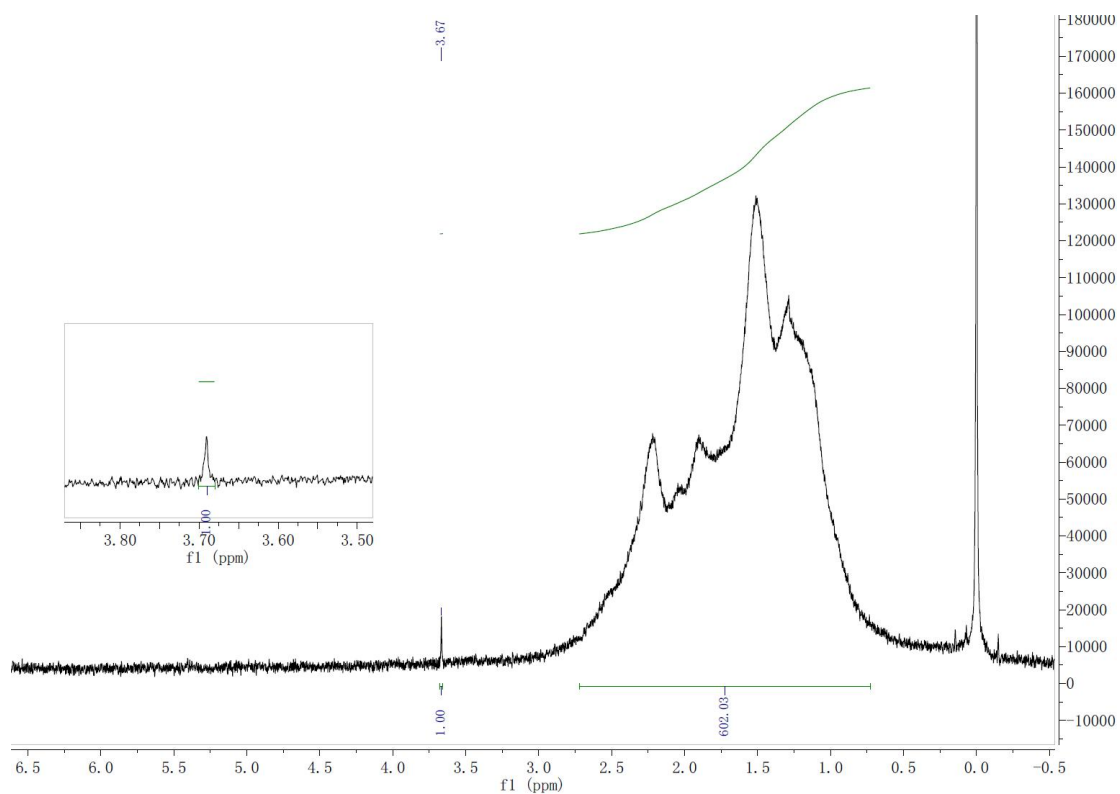

**Figure S28.**  $^1\text{H}$  NMR (400 MHz,  $\text{CDCl}_3$ ) spectra of NB-UA copolymer obtained by **4b** (entry 15, Table 2).

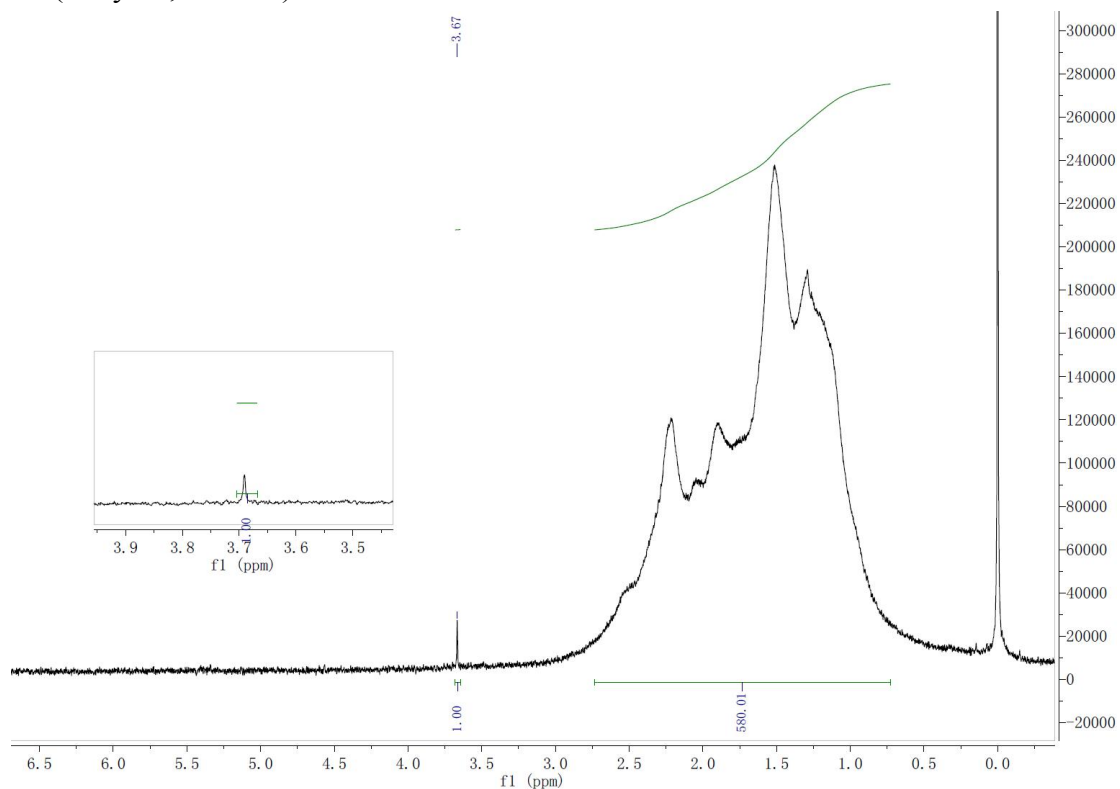

**Figure S29.**  $^1\text{H}$  NMR (400 MHz,  $\text{CDCl}_3$ ) spectra of NB-UA copolymer obtained by **4d** (entry 16, Table 2).

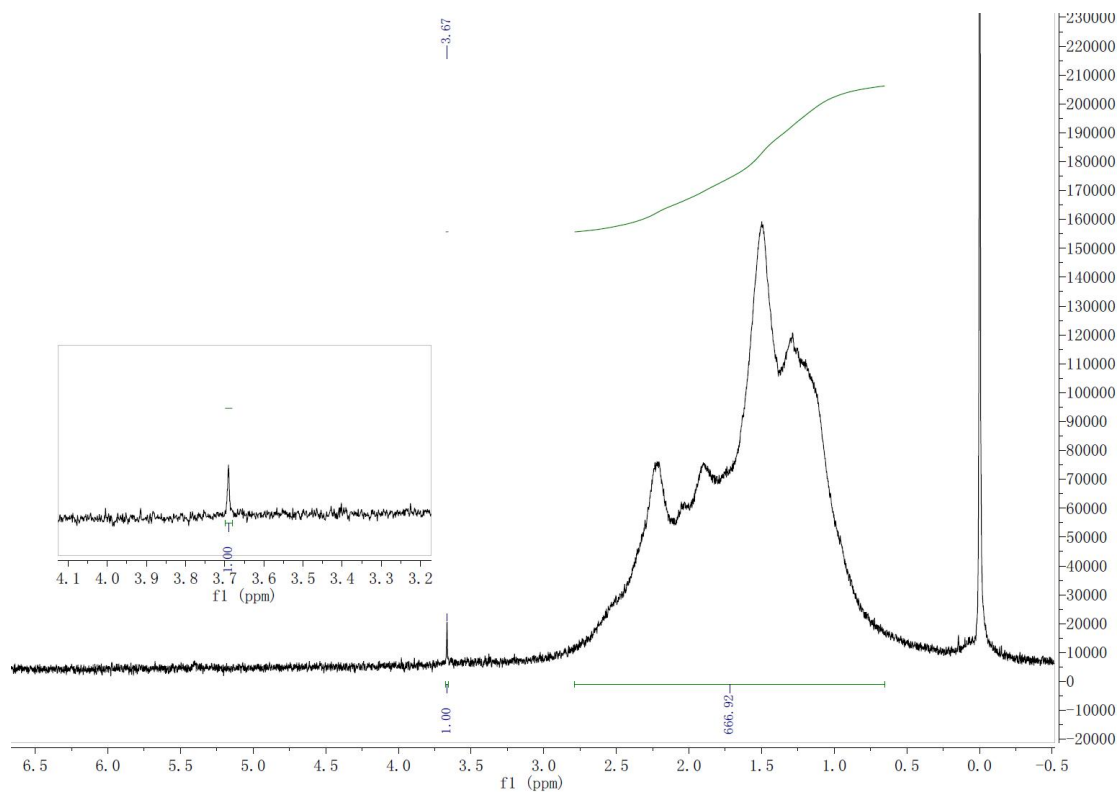

**Figure S30.**  $^1\text{H}$  NMR (400 MHz,  $\text{CDCl}_3$ ) spectra of NB-UA copolymer obtained by **3** (entry 17, Table 2).

## 4. GPC curves of polymers

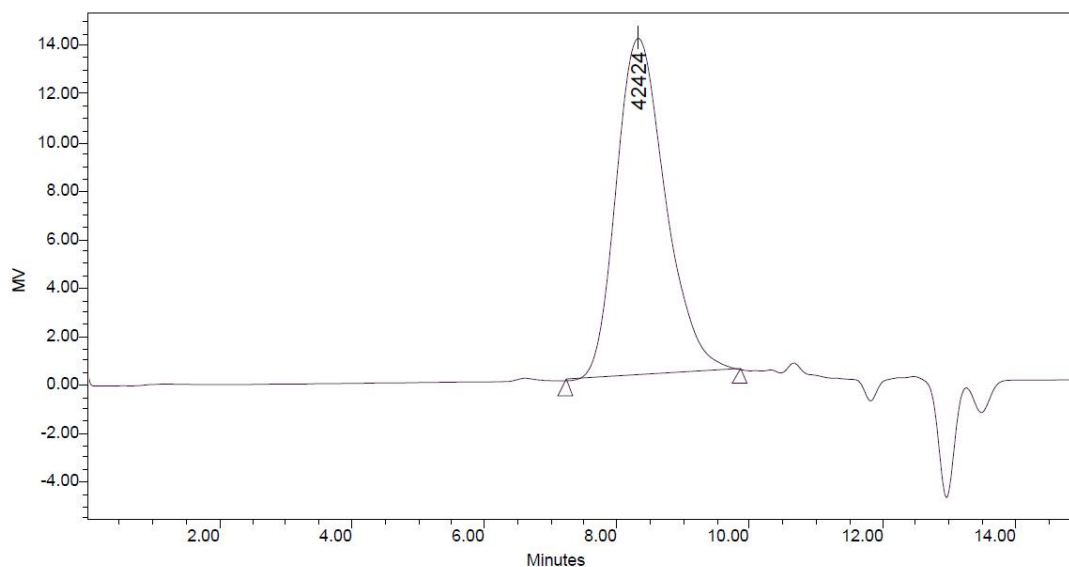

**Broad Unknown Relative Peak Table**

| Distribution Name | Mn (Daltons) | Mw (Daltons) | MP (Daltons) | Mz (Daltons) | Mz+1 (Daltons) | Polydispersity | Mz/Mw    | Mz+1/Mw  |
|-------------------|--------------|--------------|--------------|--------------|----------------|----------------|----------|----------|
| 1                 | 27737        | 45039        | 42424        | 64903        | 86662          | 1.623798       | 1.441061 | 1.924164 |

**Figure S31.** GPC curve of NB-BVE copolymer obtained by table 2 entry 2.

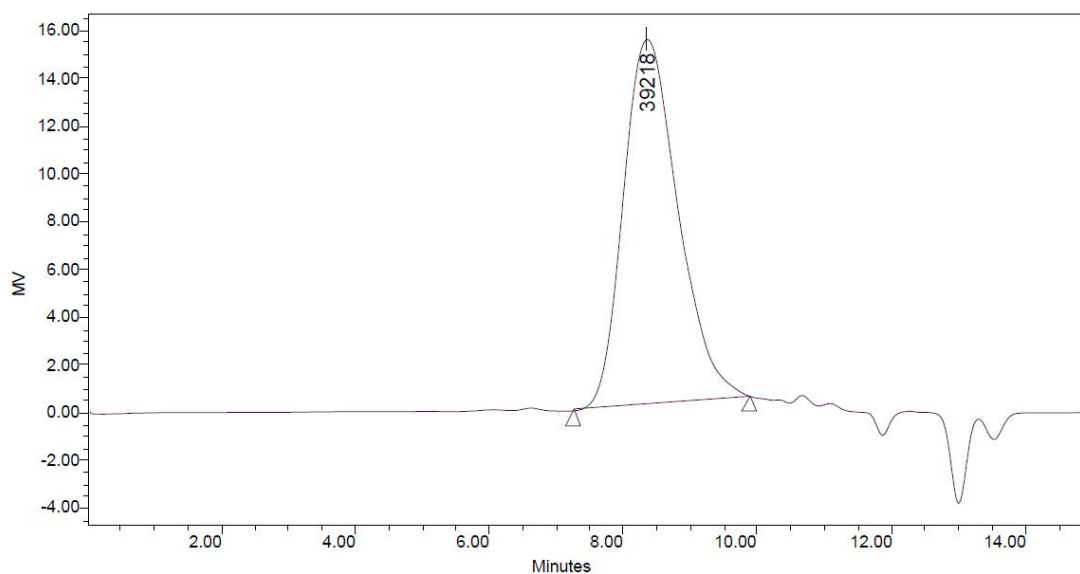

**Broad Unknown Relative Peak Table**

| Distribution Name | Mn (Daltons) | Mw (Daltons) | MP (Daltons) | Mz (Daltons) | Mz+1 (Daltons) | Polydispersity | Mz/Mw    | Mz+1/Mw  |
|-------------------|--------------|--------------|--------------|--------------|----------------|----------------|----------|----------|
| 1                 | 24143        | 42100        | 39218        | 64084        | 88868          | 1.743802       | 1.522180 | 2.110881 |

**Figure S32.** GPC curve of NB-BVE copolymer obtained by table 2 entry 3.

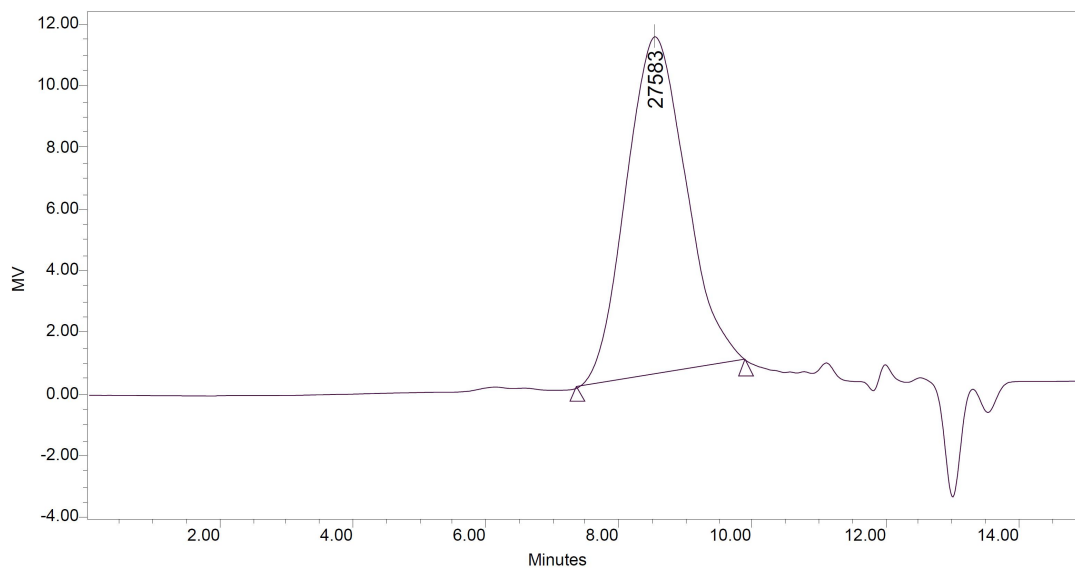

**Broad Unknown Relative Peak Table**

| Distribution Name | Mn (Daltons) | Mw (Daltons) | MP (Daltons) | Mz (Daltons) | Mz+1 (Daltons) | Polydispersity | Mz/Mw    | Mz+1/Mw  |
|-------------------|--------------|--------------|--------------|--------------|----------------|----------------|----------|----------|
| 1                 | 18480        | 34683        | 27583        | 58814        | 87801          | 1.876769       | 1.695722 | 2.531505 |

**Figure S33.** GPC curve of NB-BVE copolymer obtained by table 2 entry 4.

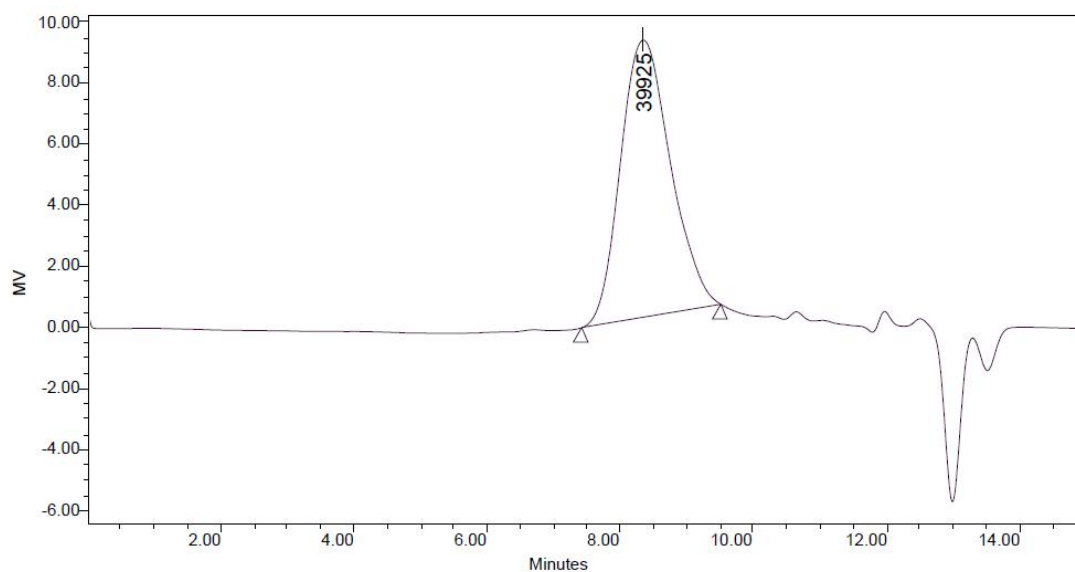

**Broad Unknown Relative Peak Table**

| Distribution Name | Mn (Daltons) | Mw (Daltons) | MP (Daltons) | Mz (Daltons) | Mz+1 (Daltons) | Polydispersity | Mz/Mw    | Mz+1/Mw  |
|-------------------|--------------|--------------|--------------|--------------|----------------|----------------|----------|----------|
| 1                 | 28161        | 43397        | 39925        | 61937        | 81964          | 1.540995       | 1.427236 | 1.888713 |

**Figure S34.** GPC curve of NB-BVE copolymer obtained by table 2 entry 6.

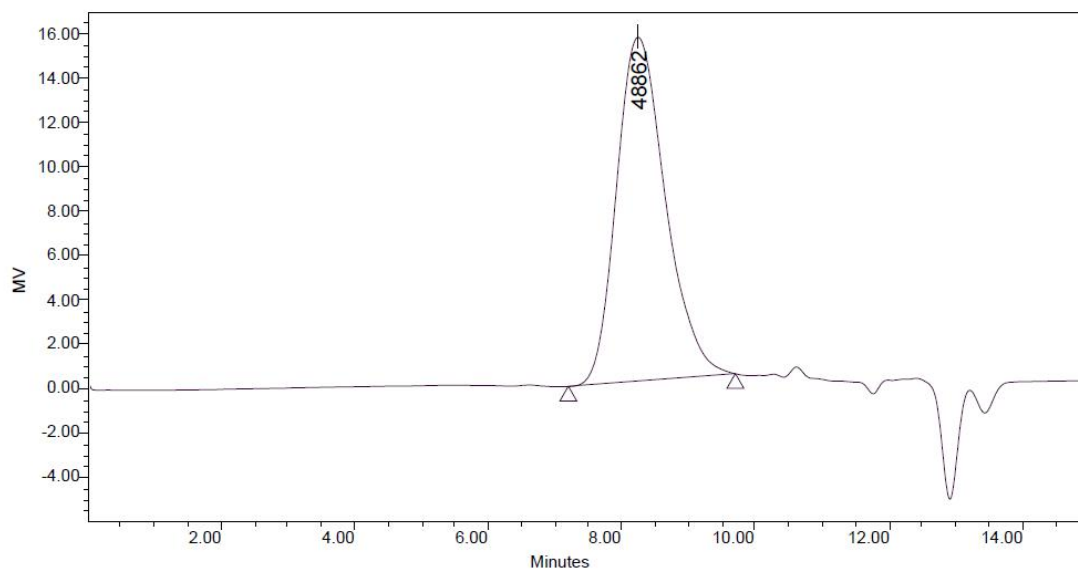

**Broad Unknown Relative Peak Table**

| Distribution Name | Mn (Daltons) | Mw (Daltons) | MP (Daltons) | Mz (Daltons) | Mz+1 (Daltons) | Polydispersity | Mz/Mw    | Mz+1/Mw  |
|-------------------|--------------|--------------|--------------|--------------|----------------|----------------|----------|----------|
| 1                 | 32211        | 51225        | 48862        | 73205        | 97275          | 1.590291       | 1.429099 | 1.898985 |

**Figure S35.** GPC curve of NB-BVE copolymer obtained by table 2 entry 7.

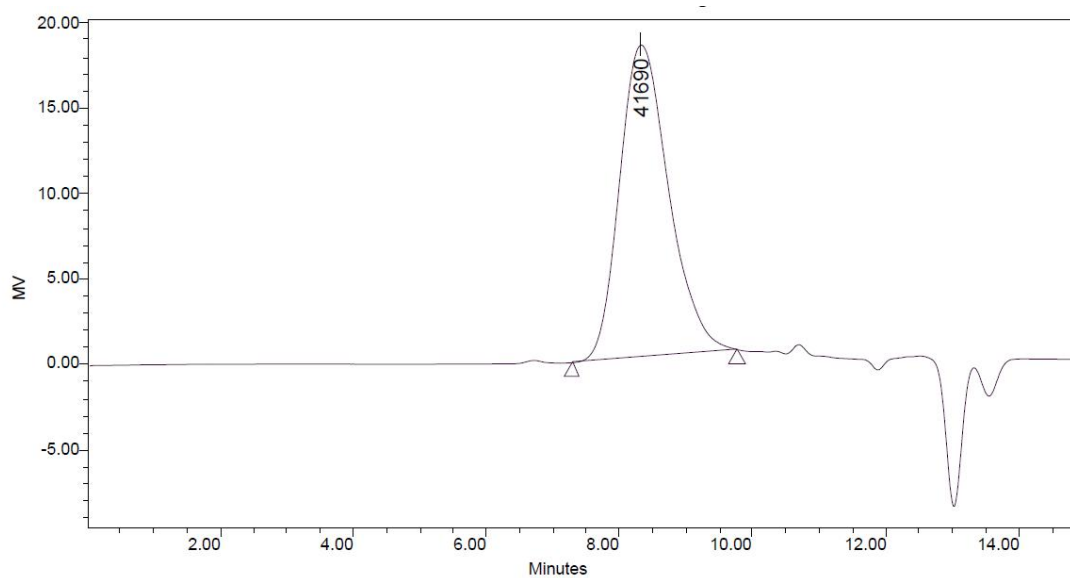

**Broad Unknown Relative Peak Table**

| Distribution Name | Mn (Daltons) | Mw (Daltons) | MP (Daltons) | Mz (Daltons) | Mz+1 (Daltons) | Polydispersity | Mz/Mw    | Mz+1/Mw  |
|-------------------|--------------|--------------|--------------|--------------|----------------|----------------|----------|----------|
| 1                 | 27516        | 43779        | 41690        | 62774        | 83771          | 1.591023       | 1.433900 | 1.913497 |

**Figure S36.** GPC curve of NB-BVE copolymer obtained by table 2 entry 8.

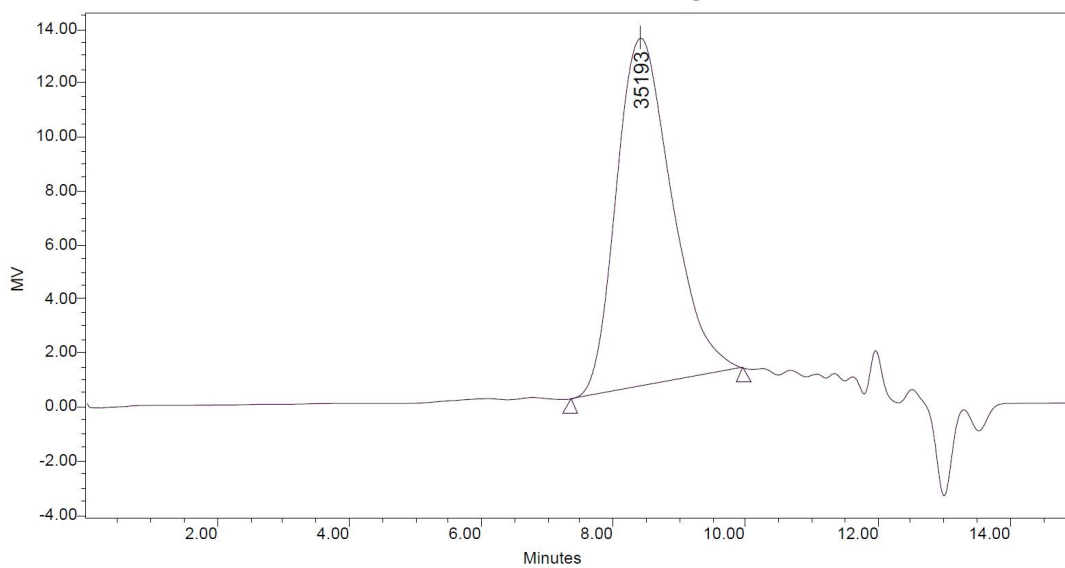

**Broad Unknown Relative Peak Table**

| Distribution Name | Mn (Daltons) | Mw (Daltons) | MP (Daltons) | Mz (Daltons) | Mz+1 (Daltons) | Polydispersity | Mz/Mw    | Mz+1/Mw  |
|-------------------|--------------|--------------|--------------|--------------|----------------|----------------|----------|----------|
| 1                 | 21148        | 37927        | 35193        | 58048        | 79585          | 1.793362       | 1.530538 | 2.098381 |

**Figure S37.** GPC curve of NB-BVE copolymer obtained by table 2 entry 9.

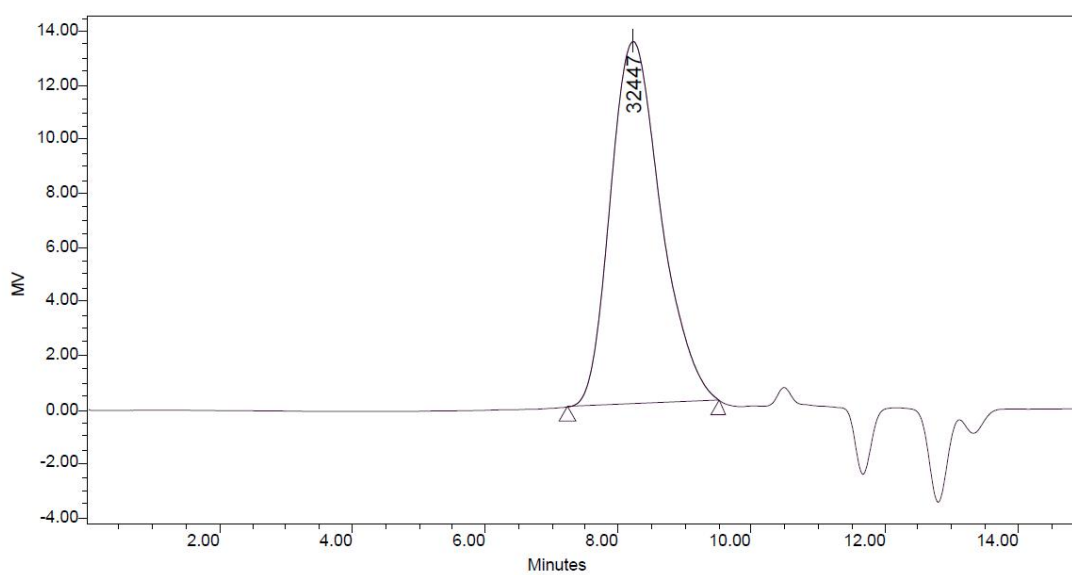

**Broad Unknown Relative Peak Table**

| Distribution Name | Mn (Daltons) | Mw (Daltons) | MP (Daltons) | Mz (Daltons) | Mz+1 (Daltons) | Polydispersity | Mz/Mw    | Mz+1/Mw  |
|-------------------|--------------|--------------|--------------|--------------|----------------|----------------|----------|----------|
| 1                 | 19599        | 35885        | 32447        | 56152        | 78016          | 1.830949       | 1.564787 | 2.174086 |

**Figure S38.** GPC curve of NB-UA copolymer obtained by Table 2 entry 11.



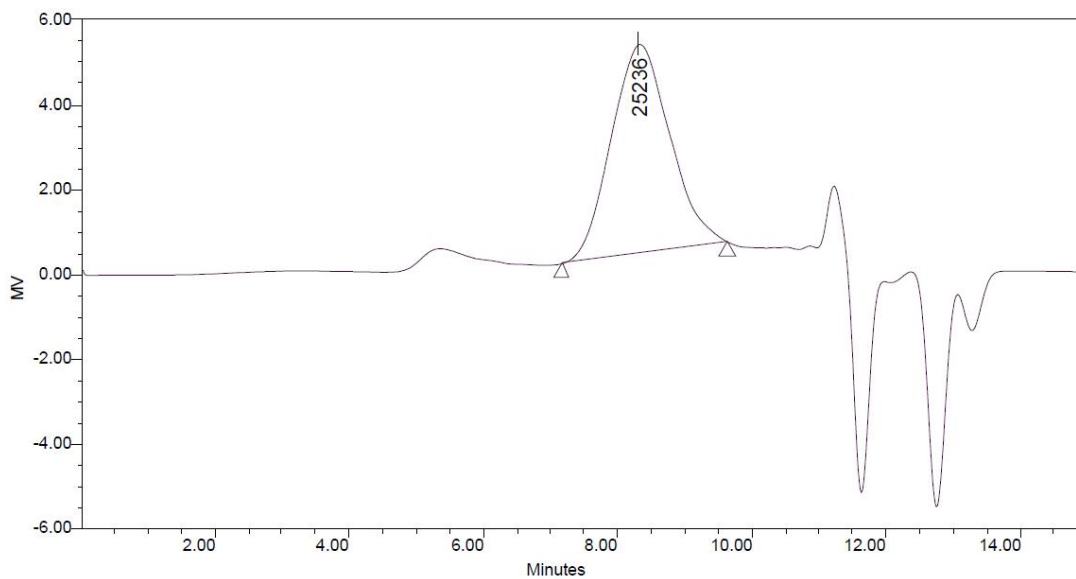

**Broad Unknown Relative Peak Table**

| Distribution Name | Mn (Daltons) | Mw (Daltons) | MP (Daltons) | Mz (Daltons) | Mz+1 (Daltons) | Polydispersity | Mz/Mw    | Mz+1/Mw  |
|-------------------|--------------|--------------|--------------|--------------|----------------|----------------|----------|----------|
| 1                 | 15732        | 33861        | 25236        | 62263        | 95707          | 2.152355       | 1.836778 | 2.826438 |

**Figure S39.** GPC curve of NB-UA copolymer obtained by Table 2 entry 12.

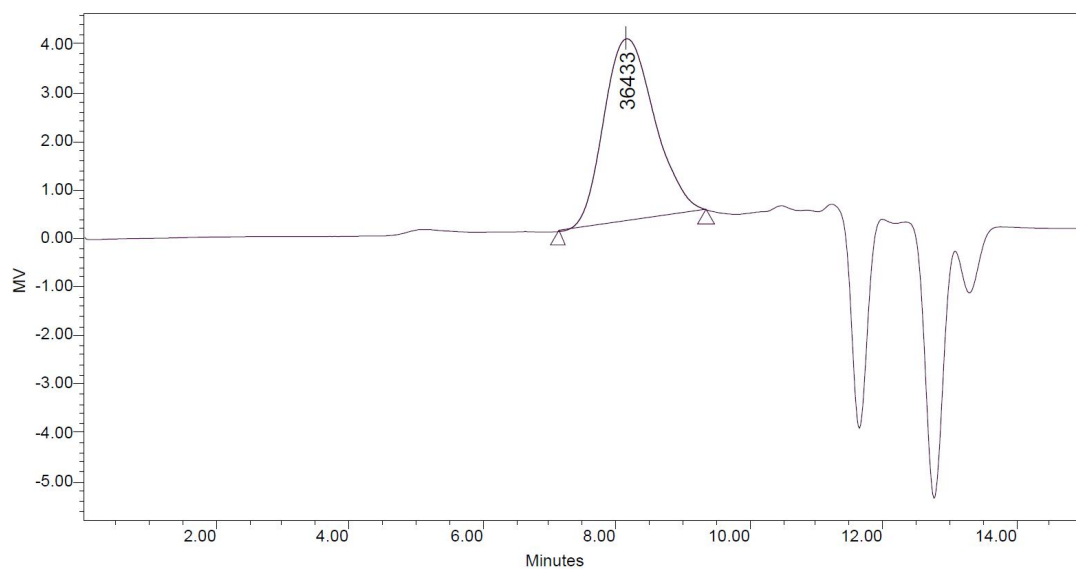

**Broad Unknown Relative Peak Table**

| Distribution Name | Mn (Daltons) | Mw (Daltons) | MP (Daltons) | Mz (Daltons) | Mz+1 (Daltons) | Polydispersity | Mz/Mw    | Mz+1/Mw  |
|-------------------|--------------|--------------|--------------|--------------|----------------|----------------|----------|----------|
| 1                 | 23328        | 41180        | 36433        | 63925        | 88518          | 1.765279       | 1.552324 | 2.149525 |

**Figure S40.** GPC curve of NB-UA copolymer obtained by Table 2 entry 14.

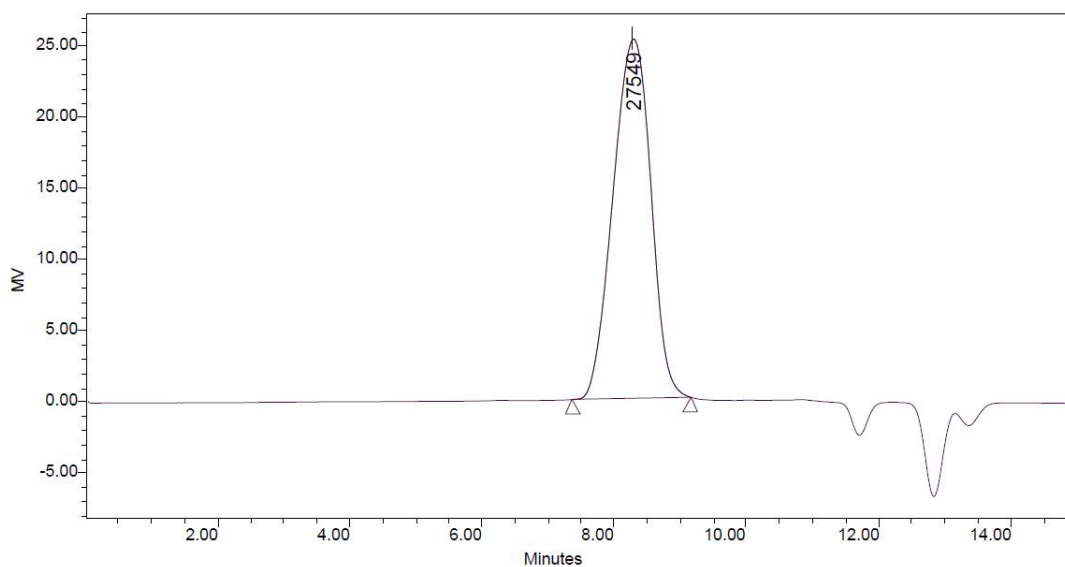

**Broad Unknown Relative Peak Table**

|   | Distribution Name | Mn (Daltons) | Mw (Daltons) | MP (Daltons) | Mz (Daltons) | Mz+1 (Daltons) | Polydispersity | Mz/Mw    | Mz+1/Mw  |
|---|-------------------|--------------|--------------|--------------|--------------|----------------|----------------|----------|----------|
| 1 |                   | 25185        | 34187        | 27549        | 45854        | 59224          | 1.357417       | 1.341280 | 1.732357 |

**Figure S41.** GPC curve of NB-UA copolymer obtained by Table 2 entry 15.

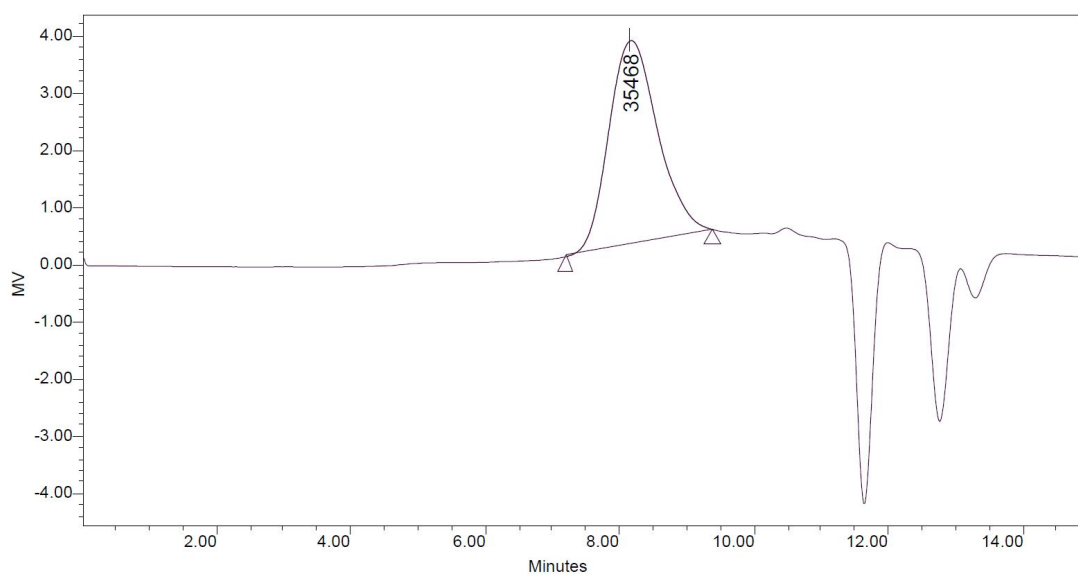

**Broad Unknown Relative Peak Table**

|   | Distribution Name | Mn (Daltons) | Mw (Daltons) | MP (Daltons) | Mz (Daltons) | Mz+1 (Daltons) | Polydispersity | Mz/Mw    | Mz+1/Mw  |
|---|-------------------|--------------|--------------|--------------|--------------|----------------|----------------|----------|----------|
| 1 |                   | 23145        | 40007        | 35468        | 61048        | 84242          | 1.728531       | 1.525931 | 2.105667 |

**Figure S42.** GPC curve of NB-UA copolymer obtained by Table 2 entry 16.

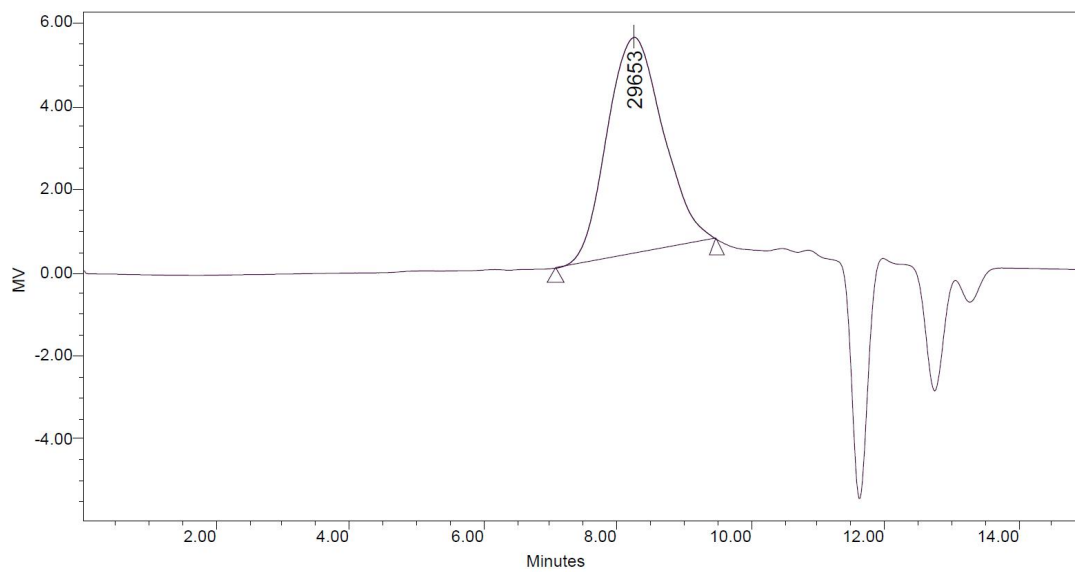

**Broad Unknown Relative Peak Table**

|   | Distribution Name | Mn (Daltons) | Mw (Daltons) | MP (Daltons) | Mz (Daltons) | Mz+1 (Daltons) | Polydispersity | Mz/Mw    | Mz+1/Mw  |
|---|-------------------|--------------|--------------|--------------|--------------|----------------|----------------|----------|----------|
| 1 |                   | 18989        | 37703        | 29653        | 64800        | 96374          | 1.985485       | 1.718694 | 2.556118 |

**Figure S43.** GPC curve of NB-UA copolymer obtained by Table 2 entry 17.

## 5. TGA curves of polymers.

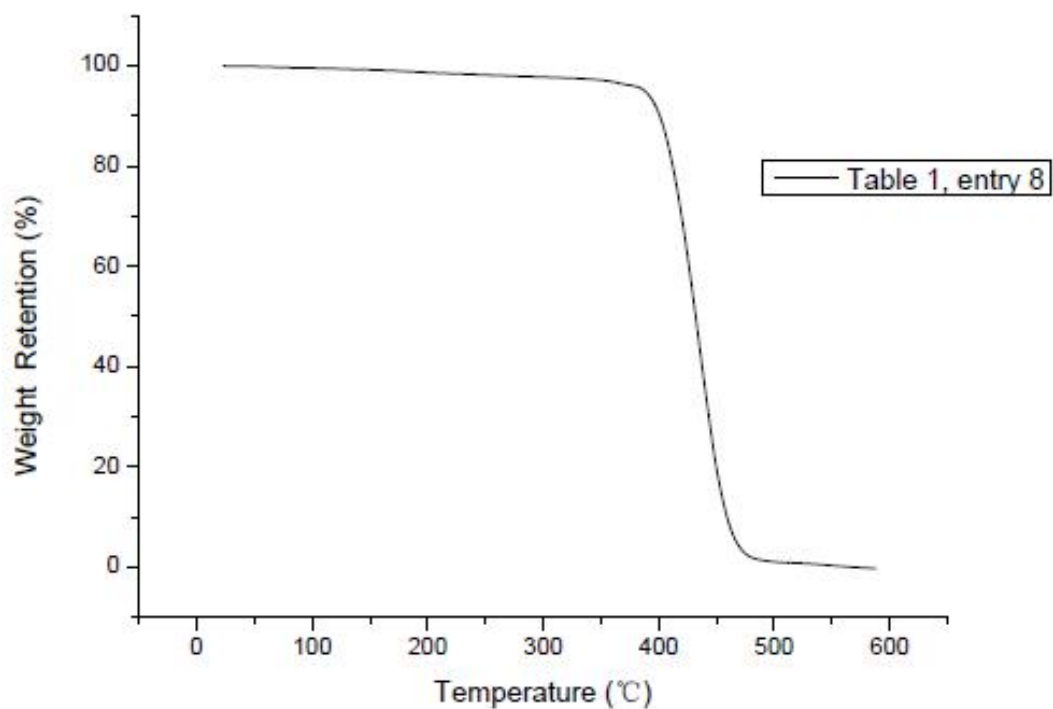

Figure S44. TGA of PNBs.

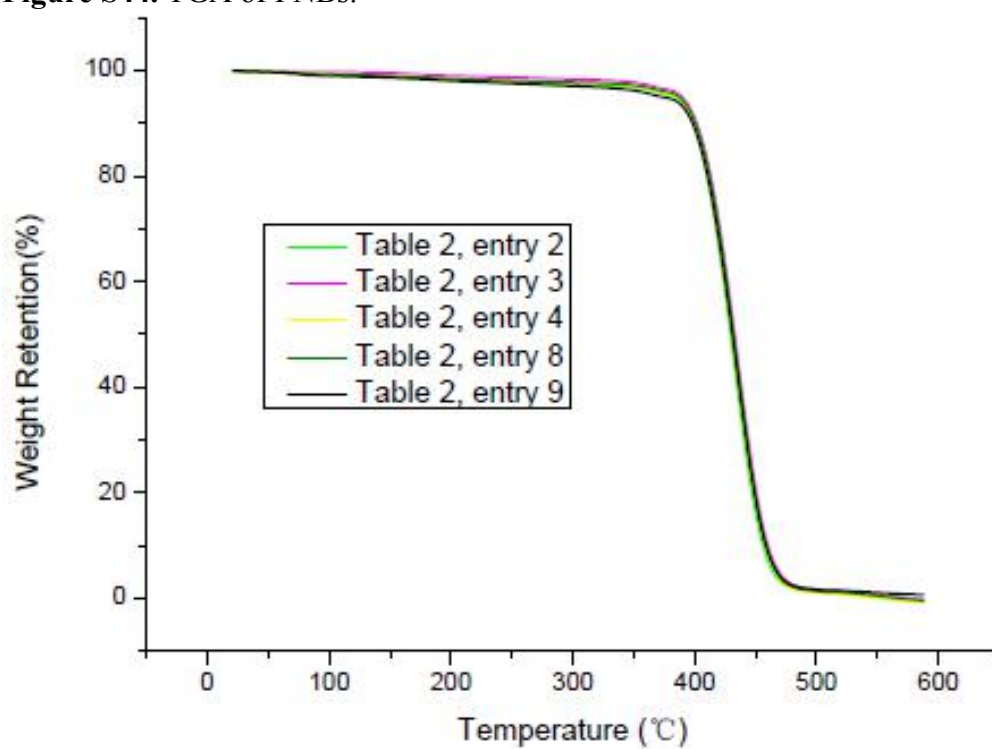

Figure S45. TGA of NB-BVE copolymer.

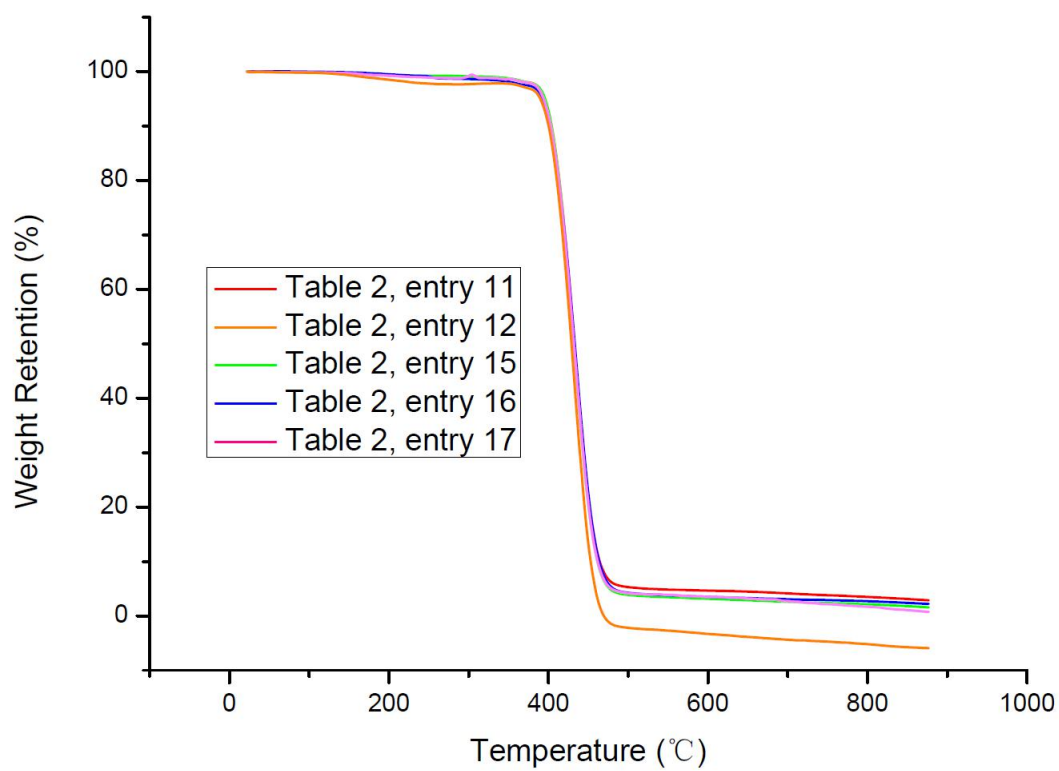

**Figure S46.** TGA of NB-UA copolymer.

## 6. DSC curves of polymers

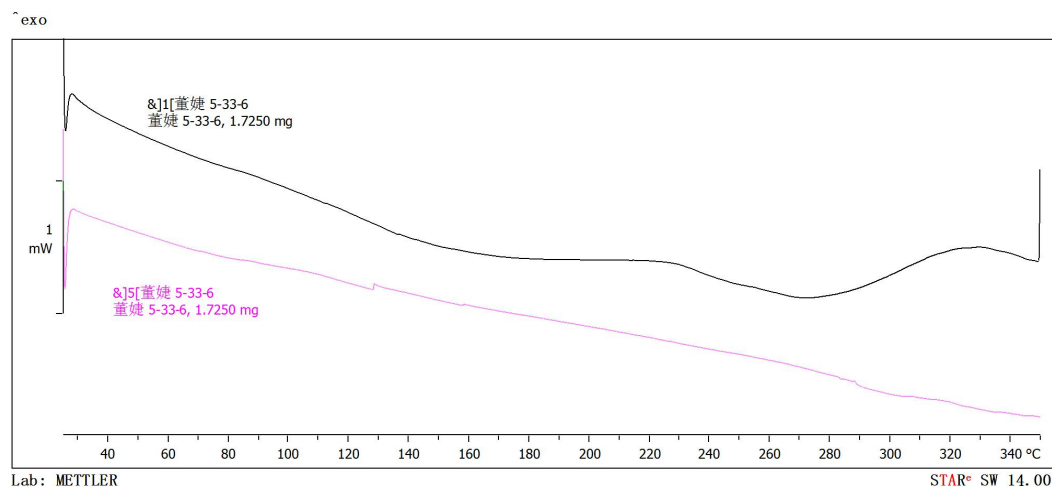

Figure S47. DSC thermograms of PNB obtained by Table 1 entry 8.

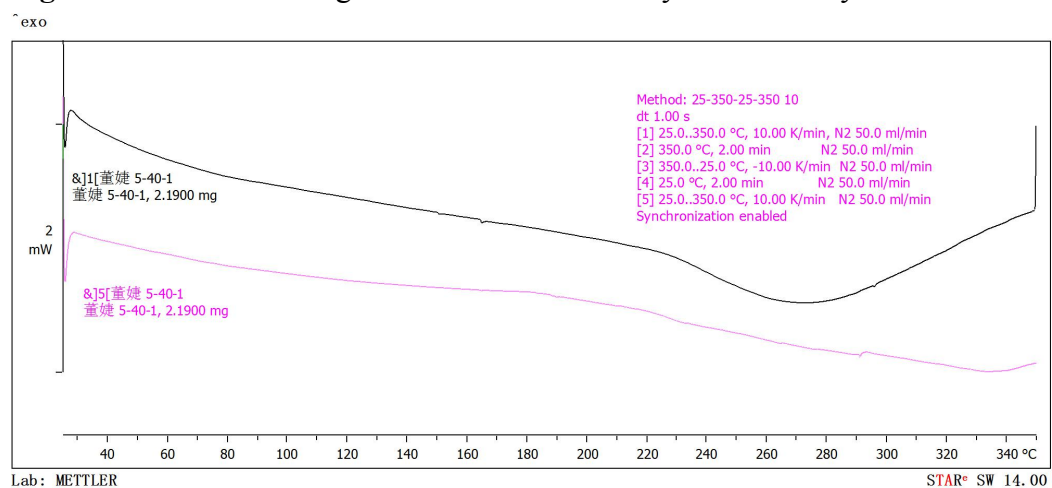

Figure S48. DSC thermograms of NB-BVE copolymer obtained by table 2 entry 2.

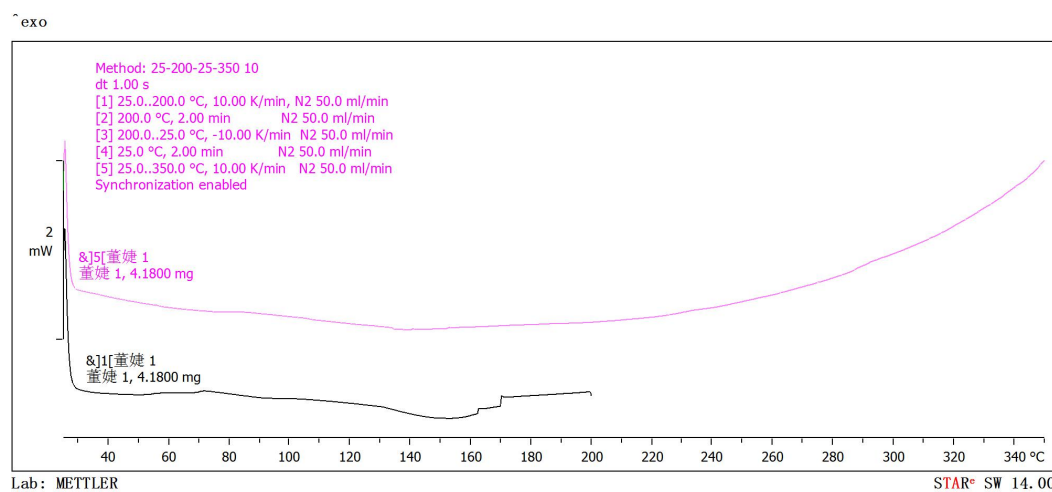

Figure S49. DSC thermograms of NB-BVE copolymer obtained by table 2 entry 3.

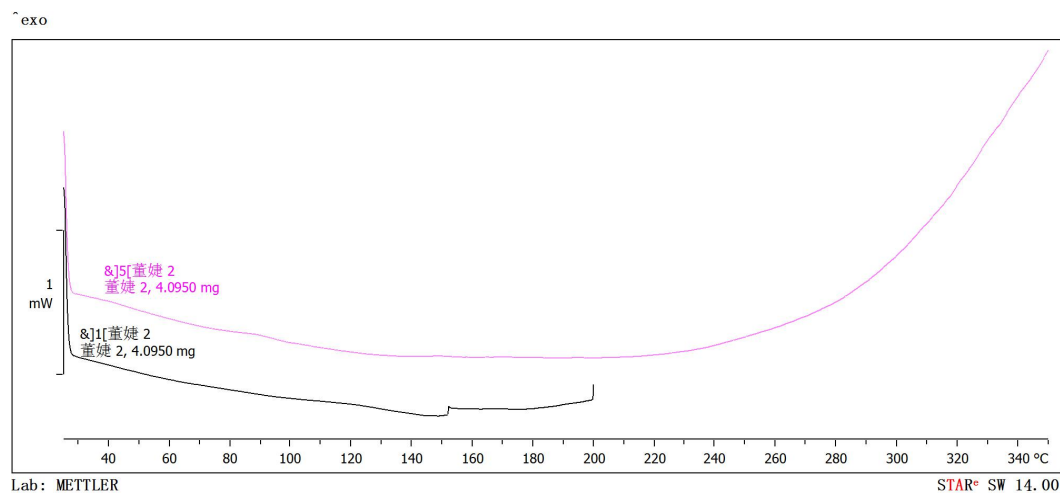

**Figure S50.** DSC thermograms of NB-BVE copolymer obtained by table 2 entry 4.

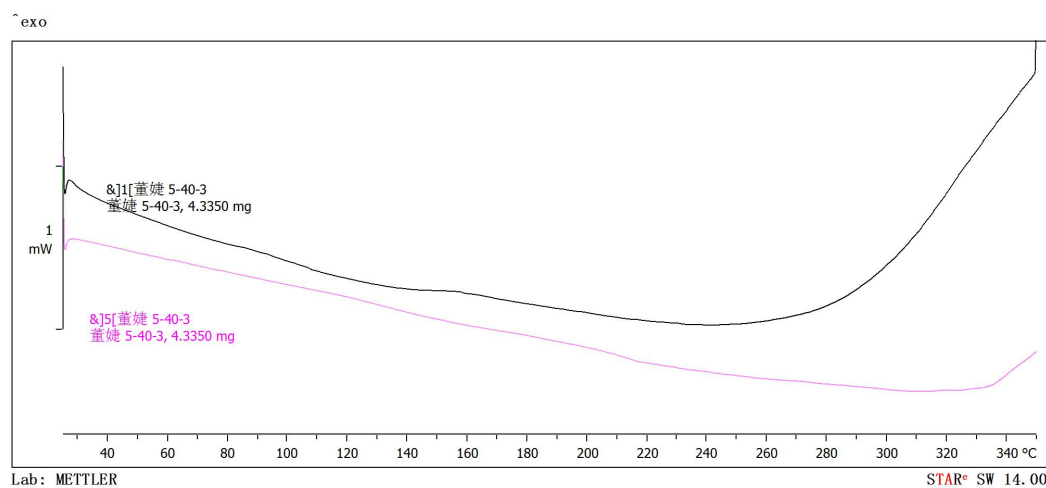

**Figure S51.** DSC thermograms of NB-BVE copolymer obtained by table 2 entry 6.

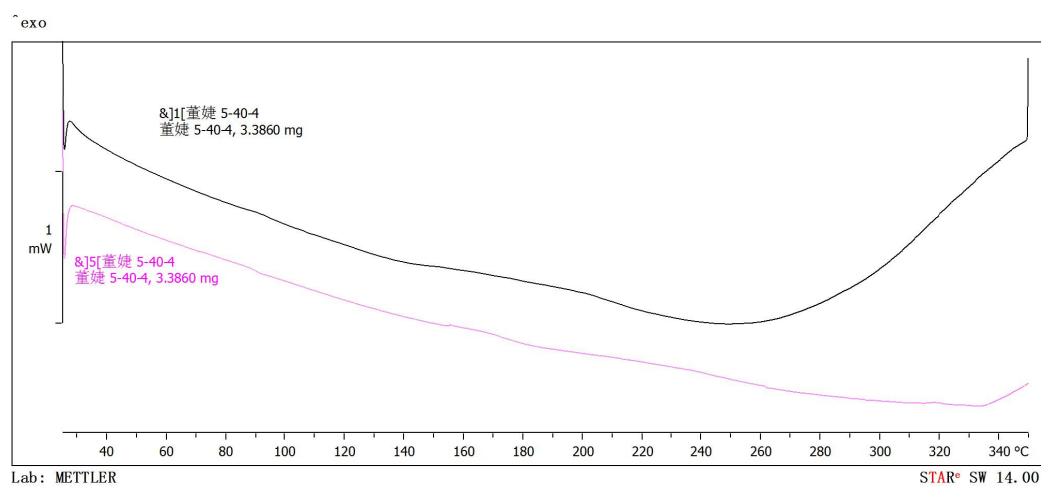

**Figure S52.** DSC thermograms of NB-BVE copolymer obtained by table 2 entry 7.

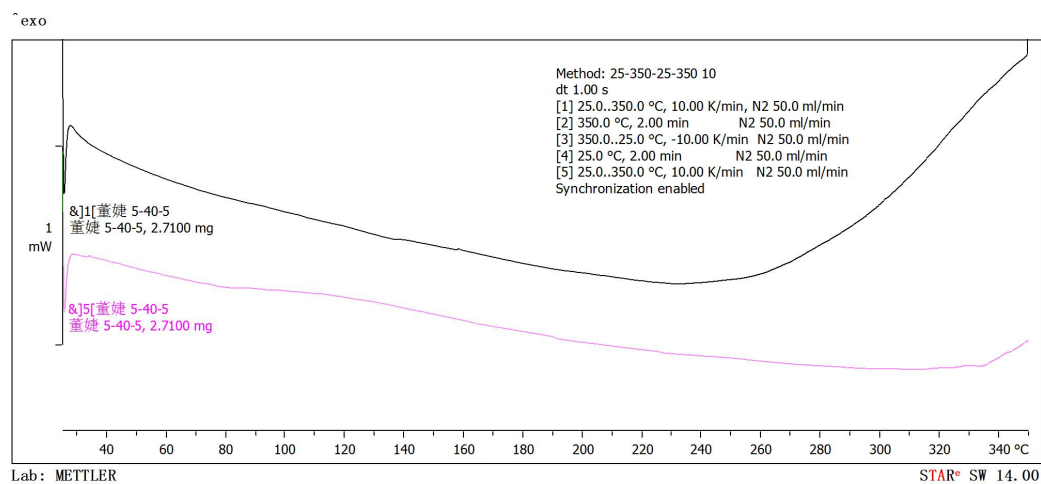

**Figure S53.** DSC thermograms of NB-BVE copolymer obtained by table 2 entry 8.

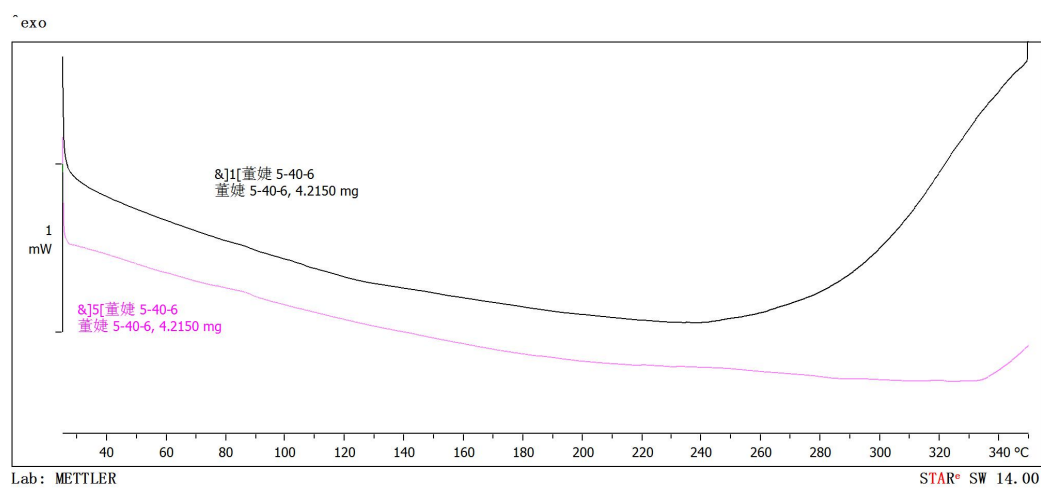

**Figure S54.** DSC thermograms of NB-BVE copolymer obtained by table 2 entry 9.

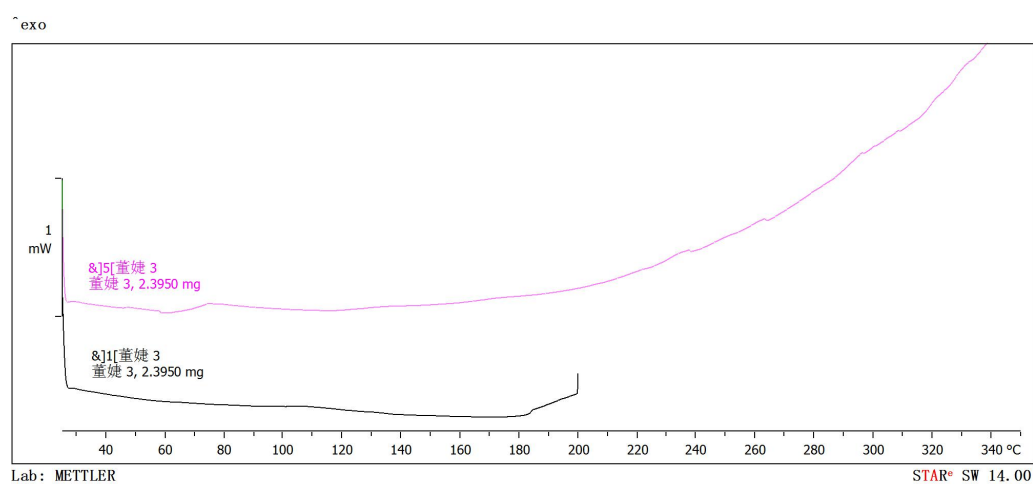

**Figure S55.** DSC thermograms of NB-UA copolymer obtained by Table 2 entry 11.



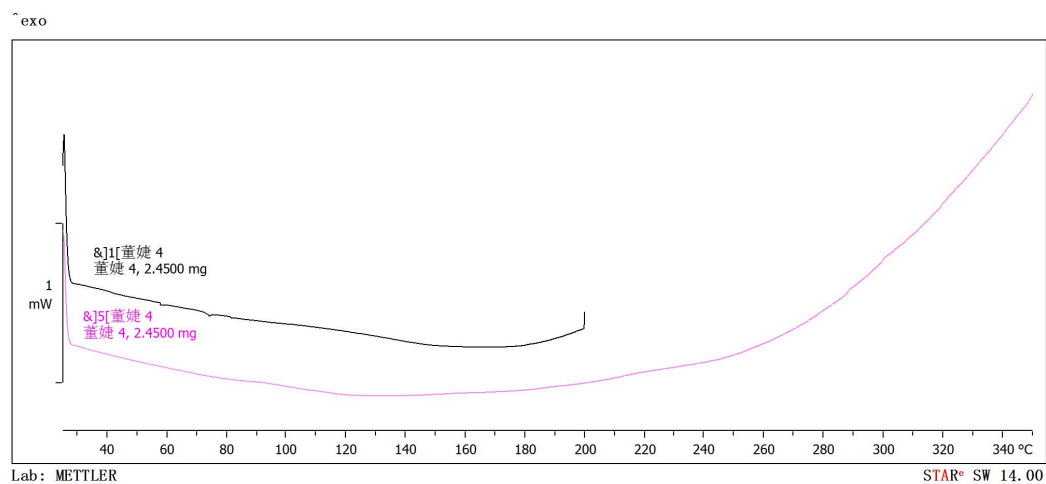

**Figure S56.** DSC thermograms of NB-UA copolymer obtained by Table 2 entry 12.

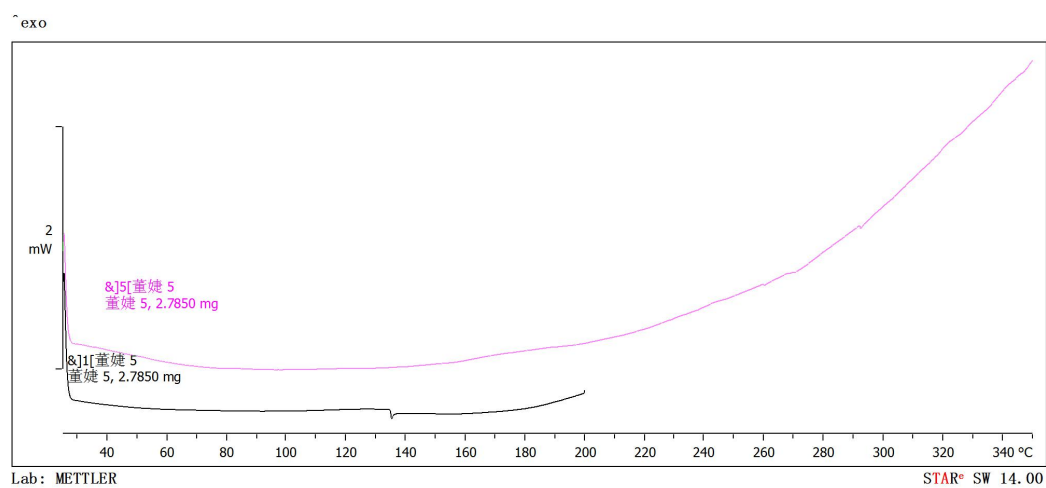

**Figure S57.** DSC thermograms of NB-BVE copolymer obtained by Table 2 entry 14.

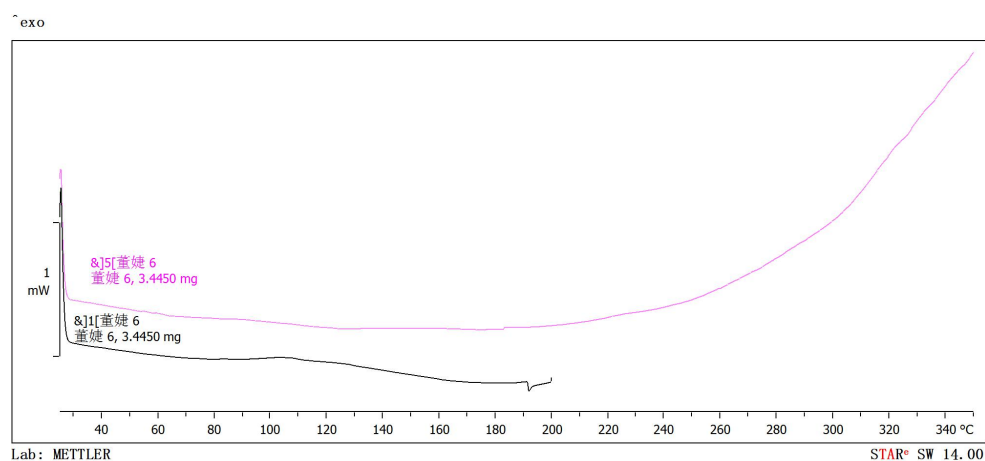

**Figure S58.** DSC thermograms of NB-UA copolymer obtained by Table 2 entry 15.

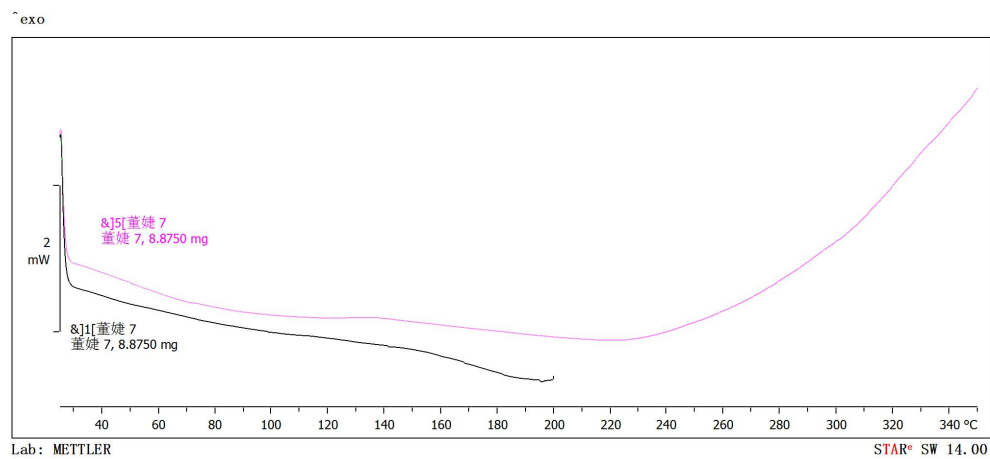

**Figure S59.** DSC thermograms of NB-UA copolymer obtained by Table 2 entry 16.

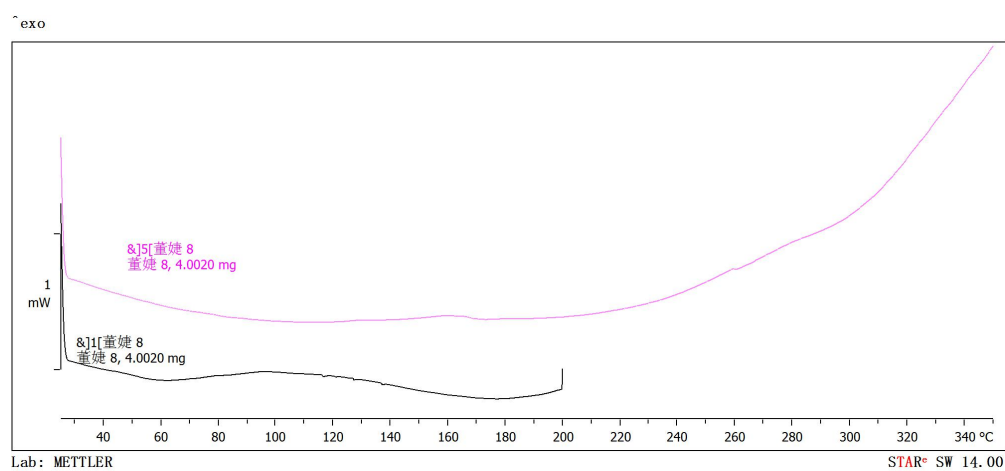

**Figure S60.** DSC thermograms of NB-UA copolymer obtained by Table 2 entry 17.

## 7. X-ray crystallography of complexes 3, 4a, and 4b

| Complex                           | [3-3]·CH <sub>2</sub> Cl <sub>2</sub>                                                                            | 4a                                                                                               | 4b·0.13 CH <sub>2</sub> Cl <sub>2</sub>                                                   |
|-----------------------------------|------------------------------------------------------------------------------------------------------------------|--------------------------------------------------------------------------------------------------|-------------------------------------------------------------------------------------------|
| Empirical formula                 | C <sub>37</sub> H <sub>54</sub> Cl <sub>4</sub> N <sub>6</sub> O <sub>2</sub> Pd <sub>2</sub>                    | C <sub>32</sub> H <sub>34</sub> ClN <sub>3</sub> OPd                                             | C <sub>34.13</sub> H <sub>38.25</sub> Cl <sub>1.25</sub> N <sub>3</sub> O <sub>3</sub> Pd |
| Formula weight                    | 969.46                                                                                                           | 618.47                                                                                           | 689.14                                                                                    |
| Temperature                       | 113.15 K                                                                                                         | 113(2) K                                                                                         | 113.15 K                                                                                  |
| Crystal system                    | triclinic                                                                                                        | Monoclinic                                                                                       | monoclinic                                                                                |
| space group                       | P-1                                                                                                              | P2(1)/n                                                                                          | I2/a                                                                                      |
| Unit cell dimensions              | a = 9.5481(5) Å<br>b = 15.1927(7) Å<br>c = 15.9838(8) Å<br>α = 62.136(5) °<br>β = 84.247(4) °<br>γ = 84.451(4) ° | a = 13.427(3) Å<br>b = 10.938(2) Å<br>c = 19.798(4) Å<br>α = 90 °<br>β = 107.14(3) °<br>γ = 90 ° | 18.1028(7) Å<br>14.4854(5) Å<br>24.8028(9) Å<br>α = 90 °<br>β = 101.780(4) °<br>γ = 90 °  |
| Volume                            | 2036.21(19) Å <sup>3</sup>                                                                                       | 2778.5(11) Å <sup>3</sup>                                                                        | 6367.0(4) Å <sup>3</sup>                                                                  |
| Z                                 | 2                                                                                                                | 4                                                                                                | 8                                                                                         |
| Calculated density                | 1.581 g/cm <sup>3</sup>                                                                                          | 1.478 g/cm <sup>3</sup>                                                                          | 1.438 g/cm <sup>3</sup>                                                                   |
| Absorption coefficient            | 1.186 mm <sup>-1</sup>                                                                                           | 0.794 mm <sup>-1</sup>                                                                           | 0.726 mm <sup>-1</sup>                                                                    |
| F(000)                            | 988.0                                                                                                            | 1272                                                                                             | 2842.0                                                                                    |
| Crystal size                      | 0.2 x 0.18 x 0.16 mm <sup>3</sup>                                                                                | 0.200 x 0.180 x 0.120 mm <sup>3</sup>                                                            | 0.19 x 0.17 x 0.15 mm <sup>3</sup>                                                        |
| 2θ range for data collection      | 4.988 to 52.744 °                                                                                                | 1.634 to 27.879 °                                                                                | 3.354 to 52.734 °                                                                         |
| Index ranges                      | -11 ≤ h ≤ 11,                                                                                                    | -17 ≤ h ≤ 17,                                                                                    | -22 ≤ h ≤ 22,                                                                             |
| Reflections collected             | 21597                                                                                                            | 32586                                                                                            | 33438                                                                                     |
| Independent reflections           | 8298 [R(int) = 0.0574,<br>R(sigma) = 0.0681]                                                                     | 6620 [R(int) = 0.0548]                                                                           | 6509 [R(int) = 0.0692,<br>R(sigma) = 0.0513]                                              |
| Data / restraints / parameters    | 8298/0/472                                                                                                       | 6620 / 6 / 349                                                                                   | 6509/21/414                                                                               |
| Goodness-of-fit on F <sup>2</sup> | 1.064                                                                                                            | 1.081                                                                                            | 1.043                                                                                     |
| Final R indices [ I ≥ 2σ (I) ]    | R1 = 0.0392, wR2 = 0.0816                                                                                        | R1 = 0.0375, wR2 = 0.0863                                                                        | R1 = 0.0402, wR2 = 0.0822                                                                 |
| R indices (all data)              | R1 = 0.0524, wR2 = 0.0916                                                                                        | R1 = 0.0446, wR2 = 0.0908                                                                        | R1 = 0.0544, wR2 = 0.0900                                                                 |
| Largest diff. peak and hole       | 0.68/-0.93 e Å <sup>-3</sup>                                                                                     | 1.204/-0.963 e Å <sup>-3</sup>                                                                   | 0.57/-0.53 e Å <sup>-3</sup>                                                              |
